# Supplementary figures and images for: Stereoselective preparation of β,γ-methano-GABA derivatives
Source: Royal Society of Chemistry journal article supplement (doi:10.1039/c1ob06095c), 2011-01-01

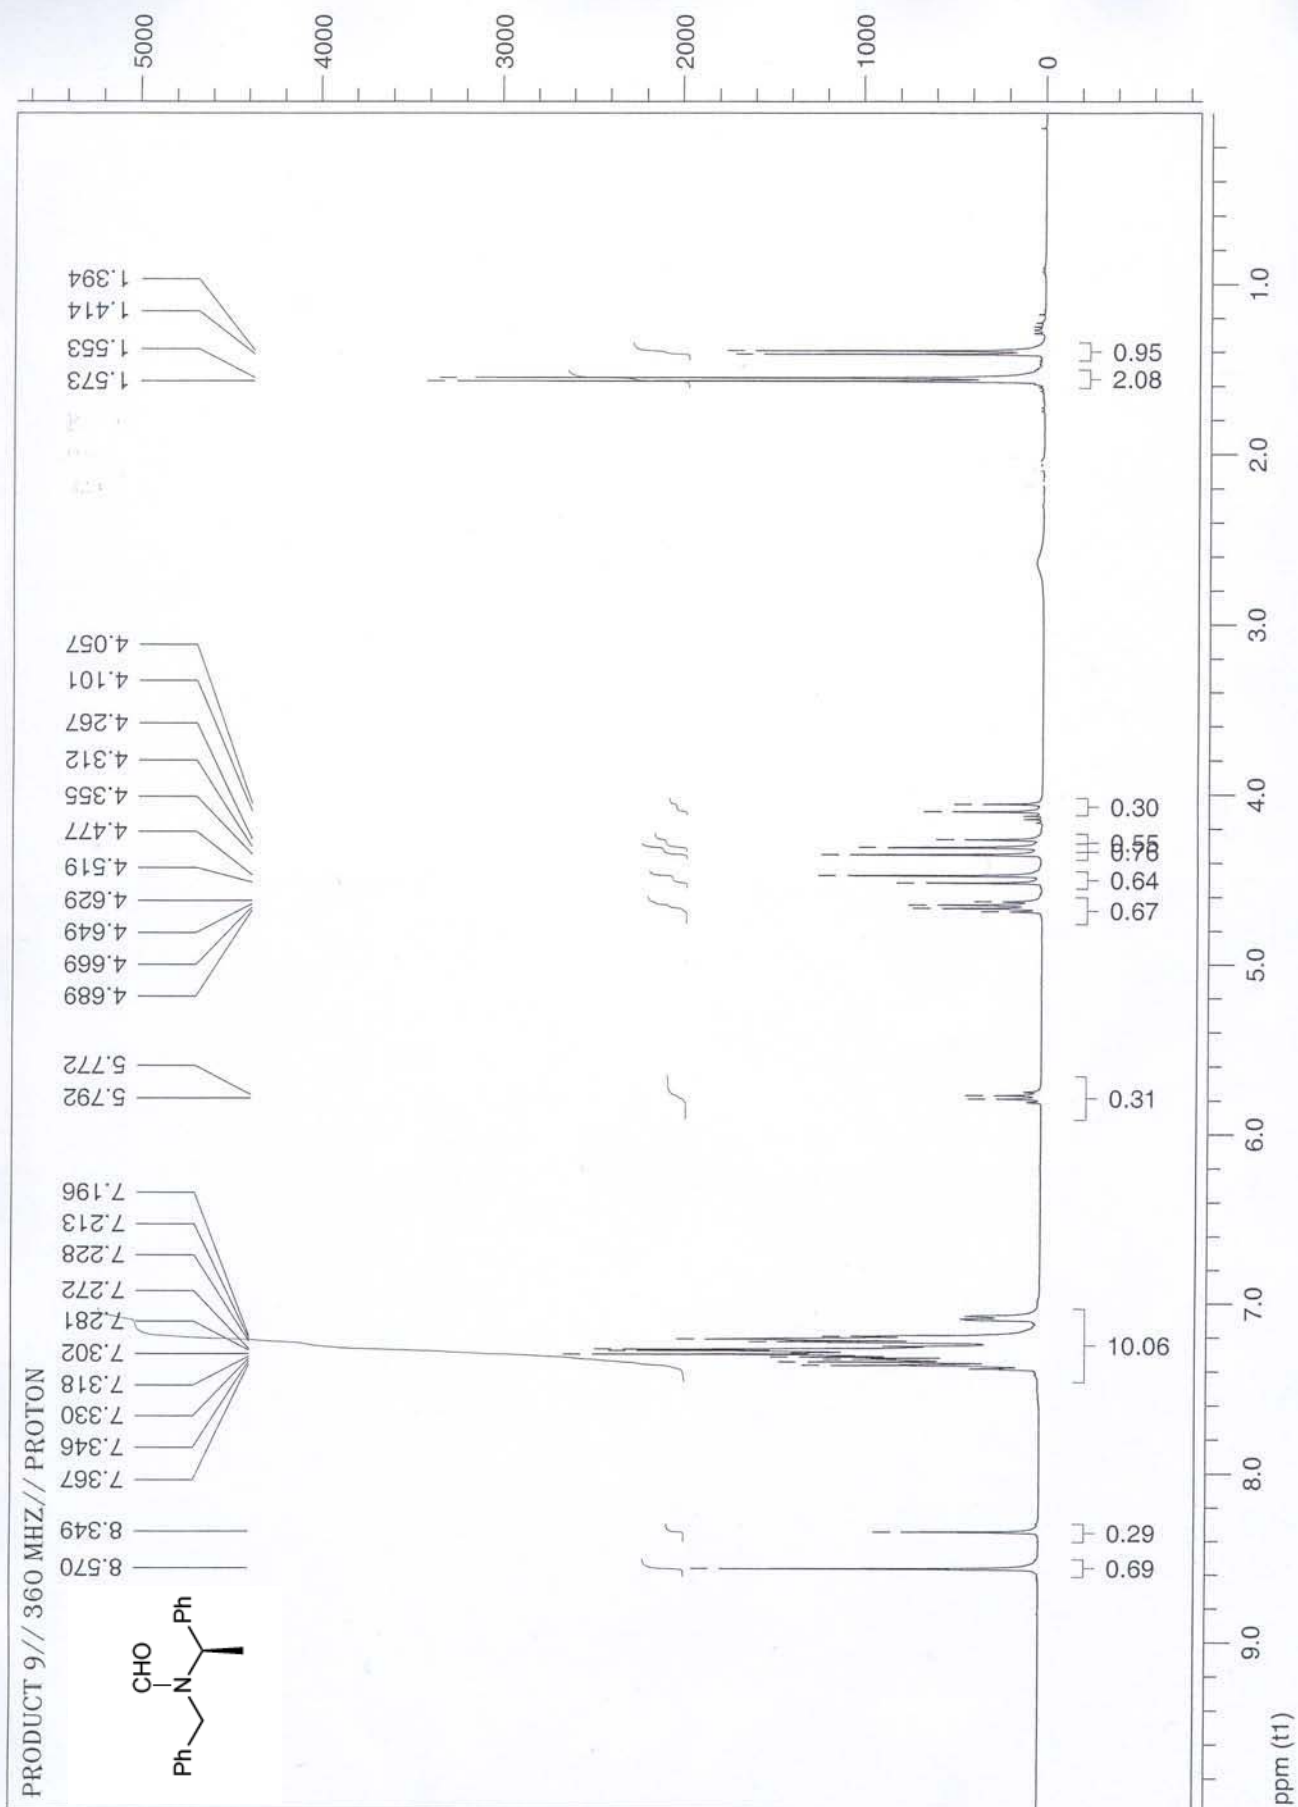

PRODUCT 9// 90 MHz// JMOD

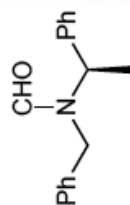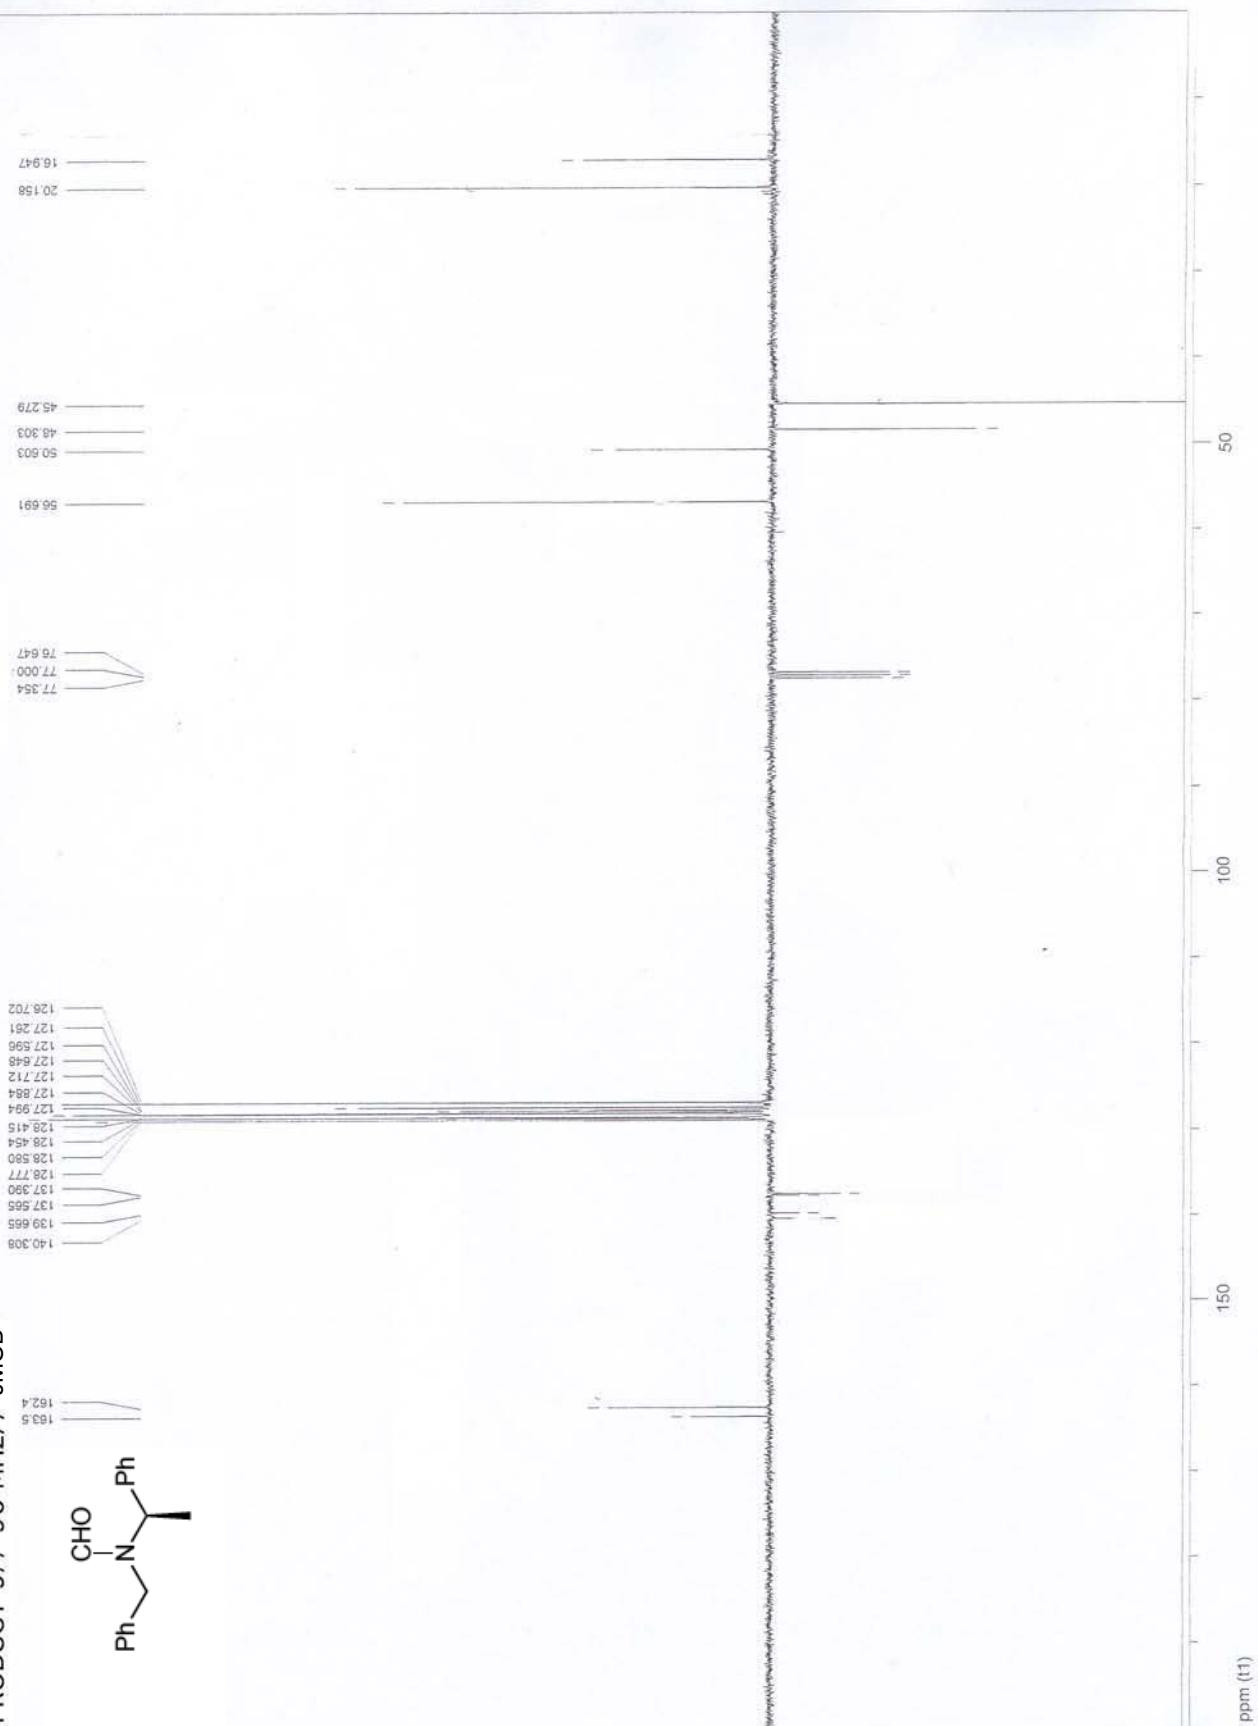

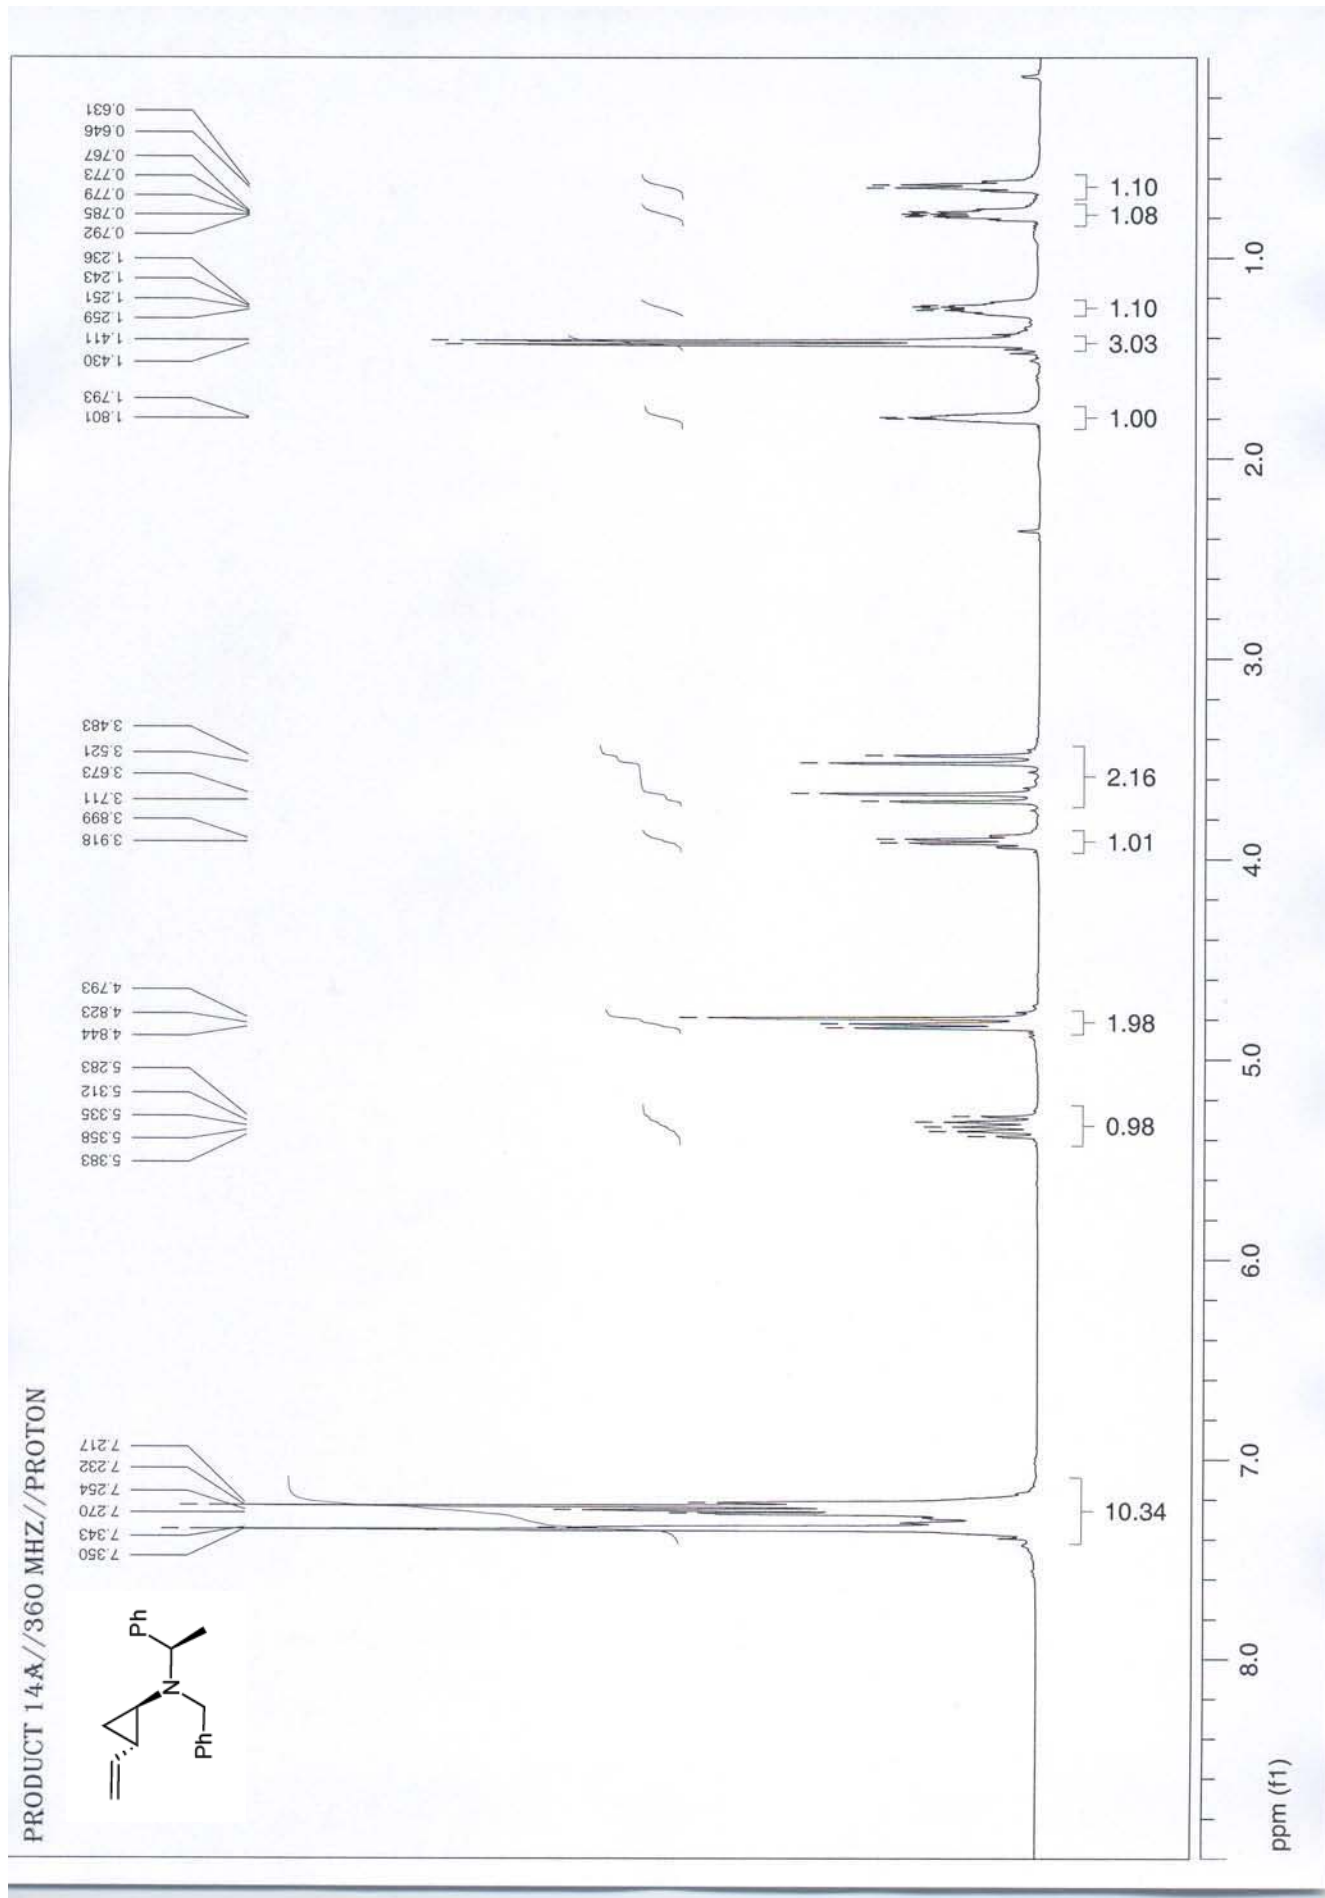

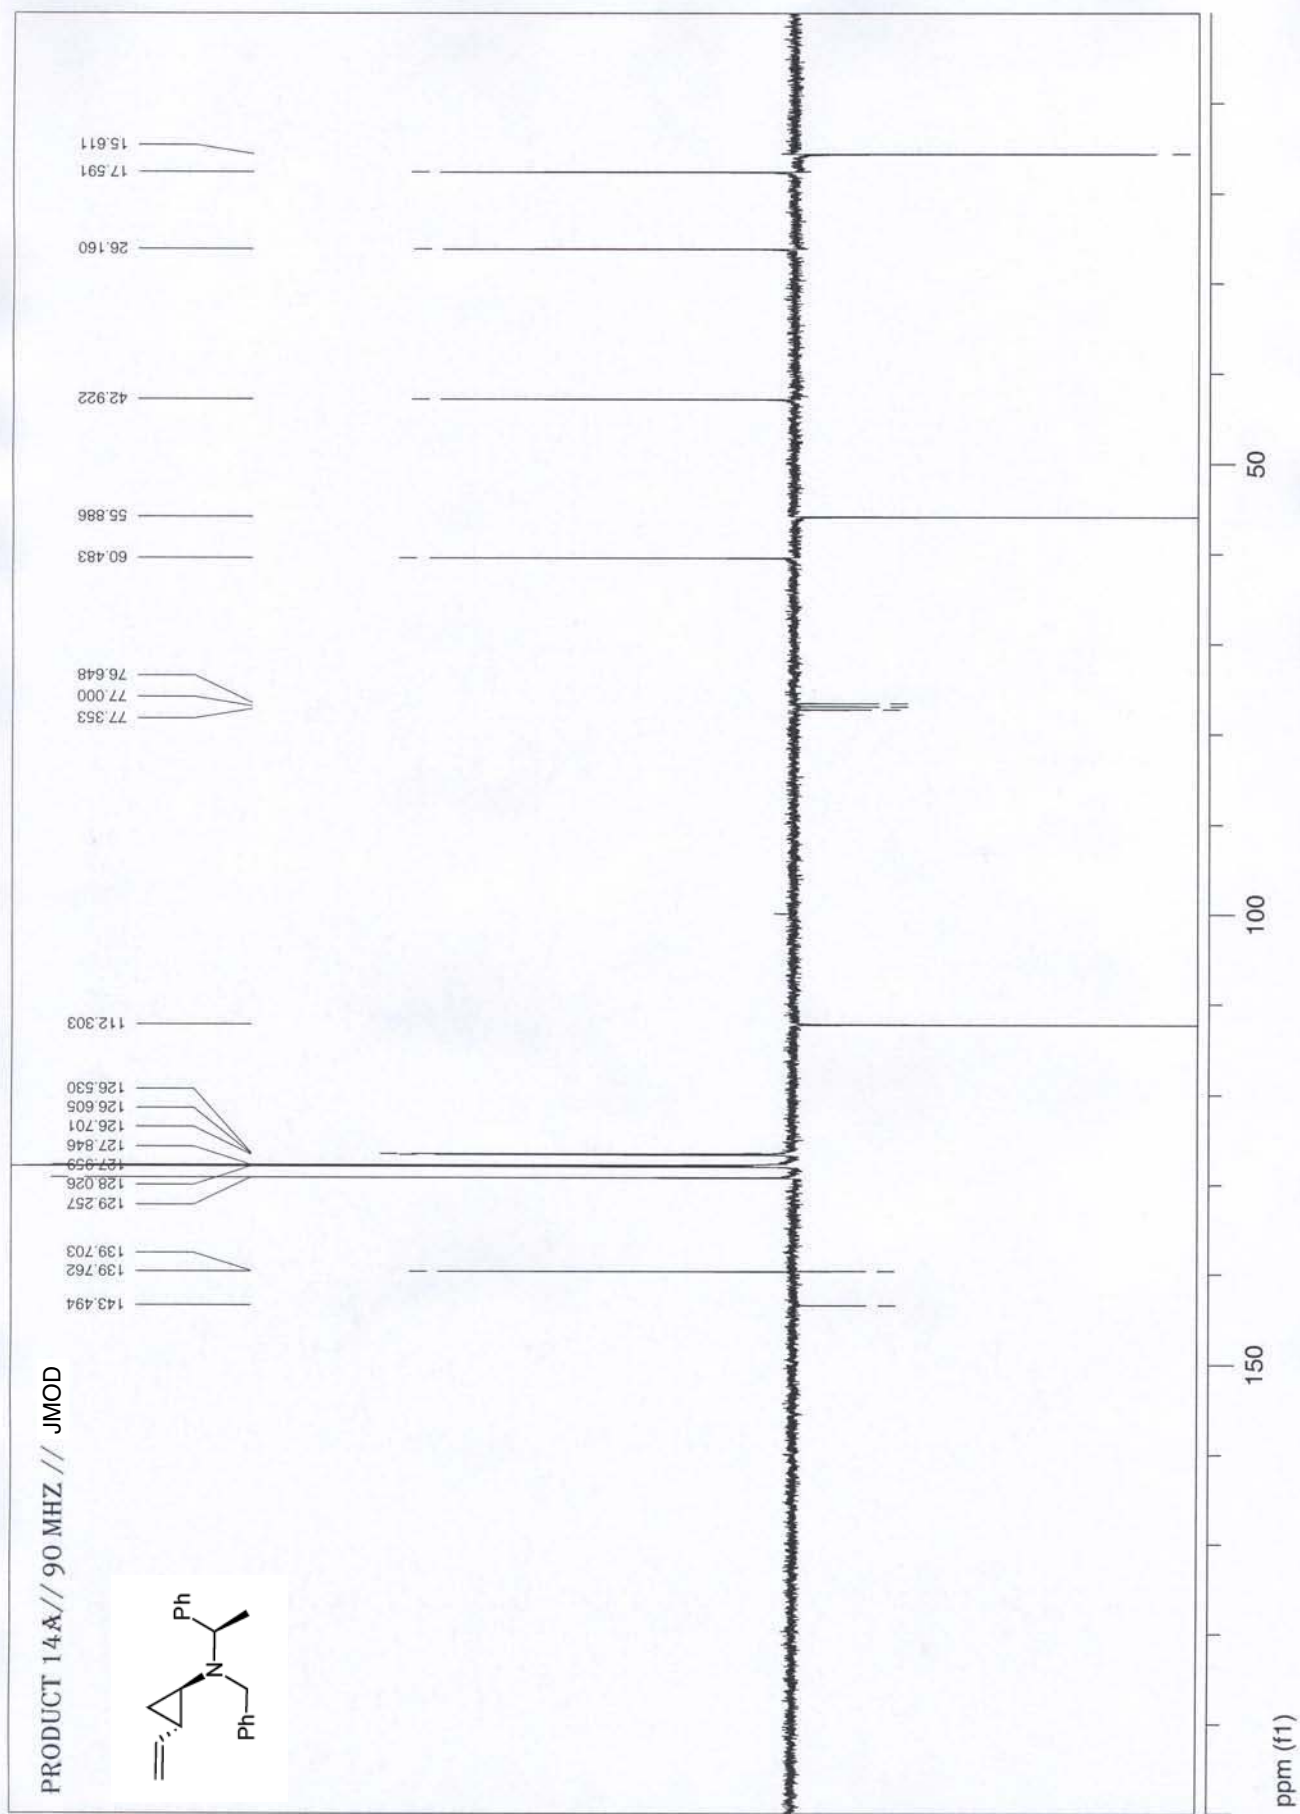

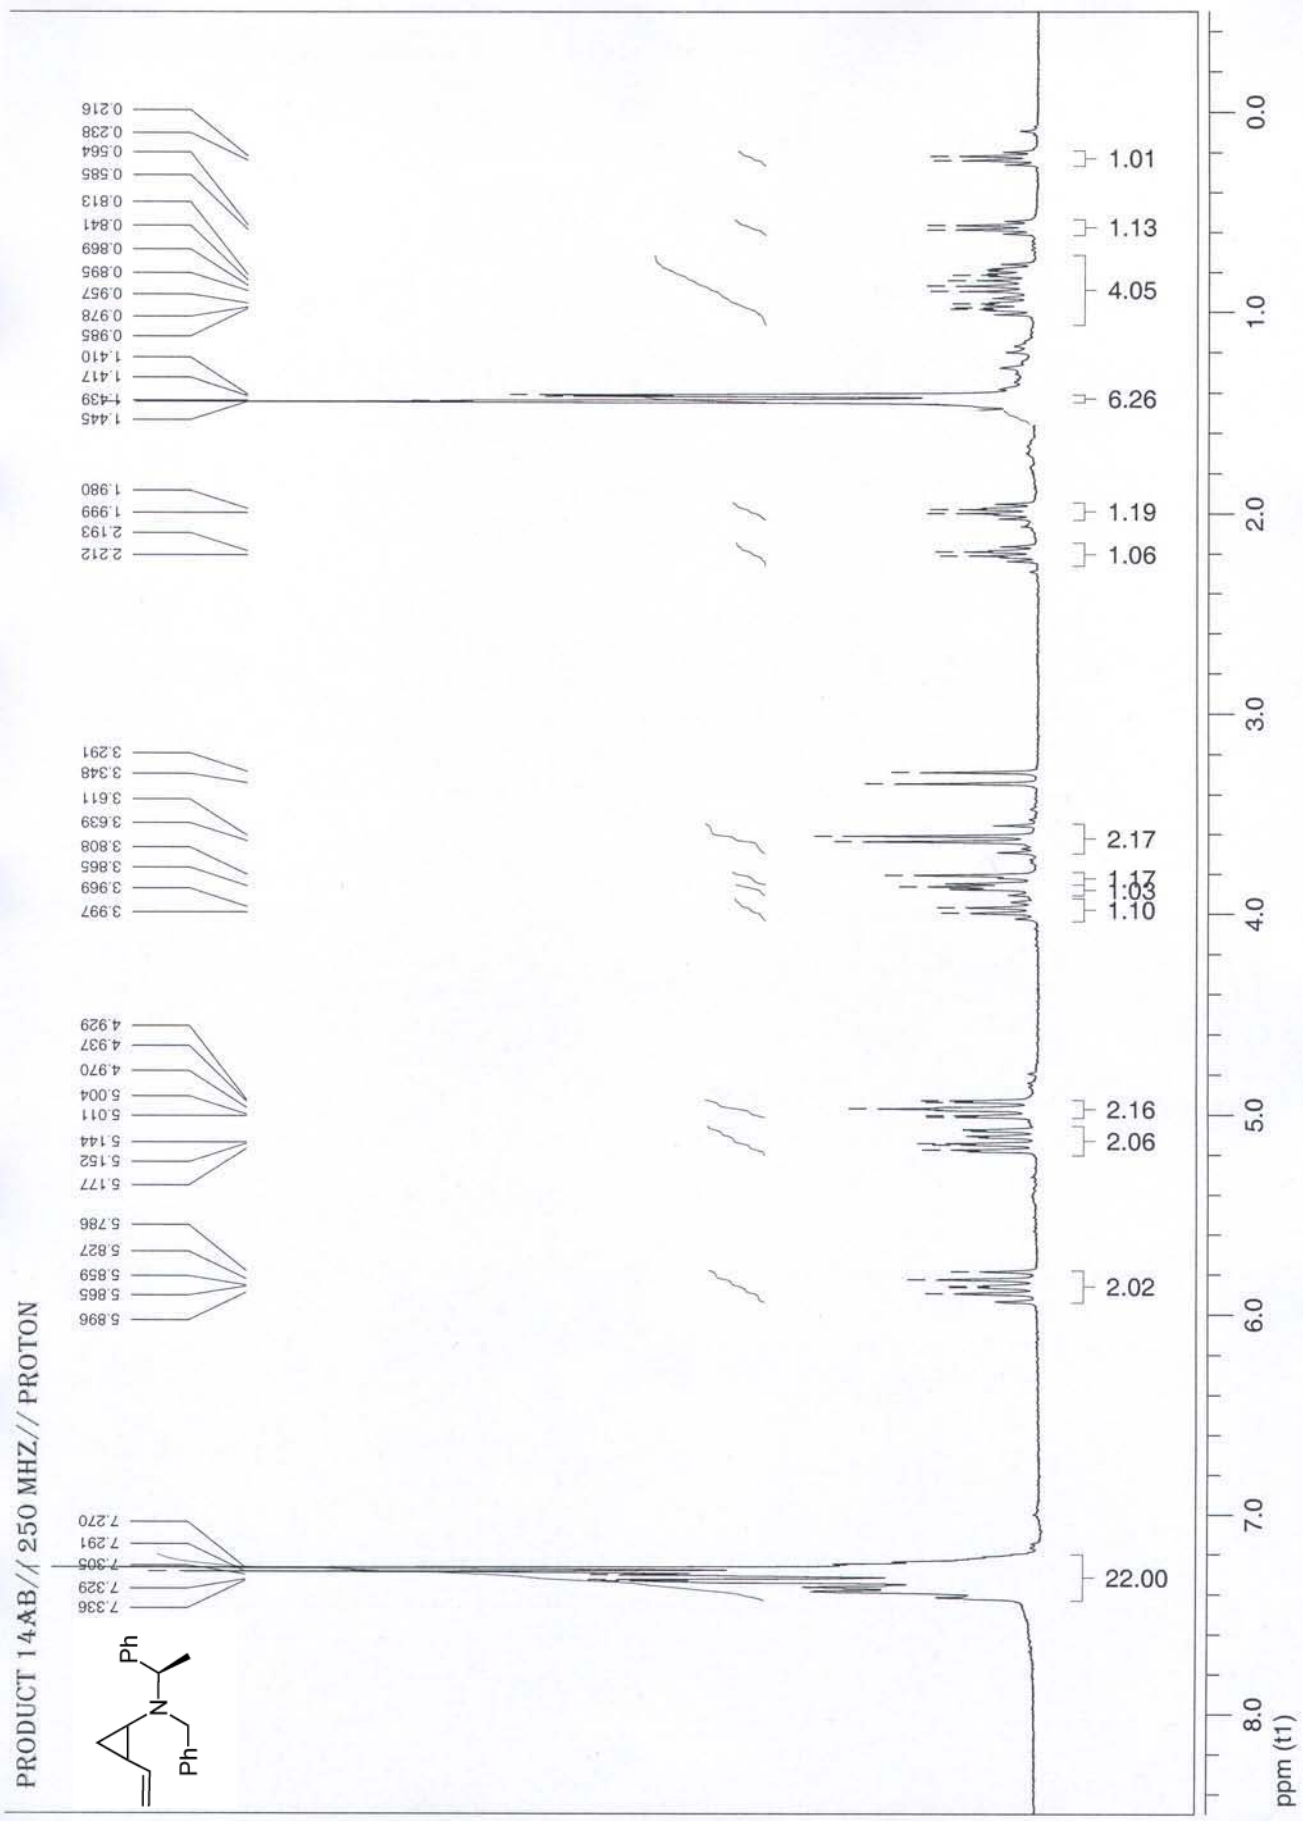

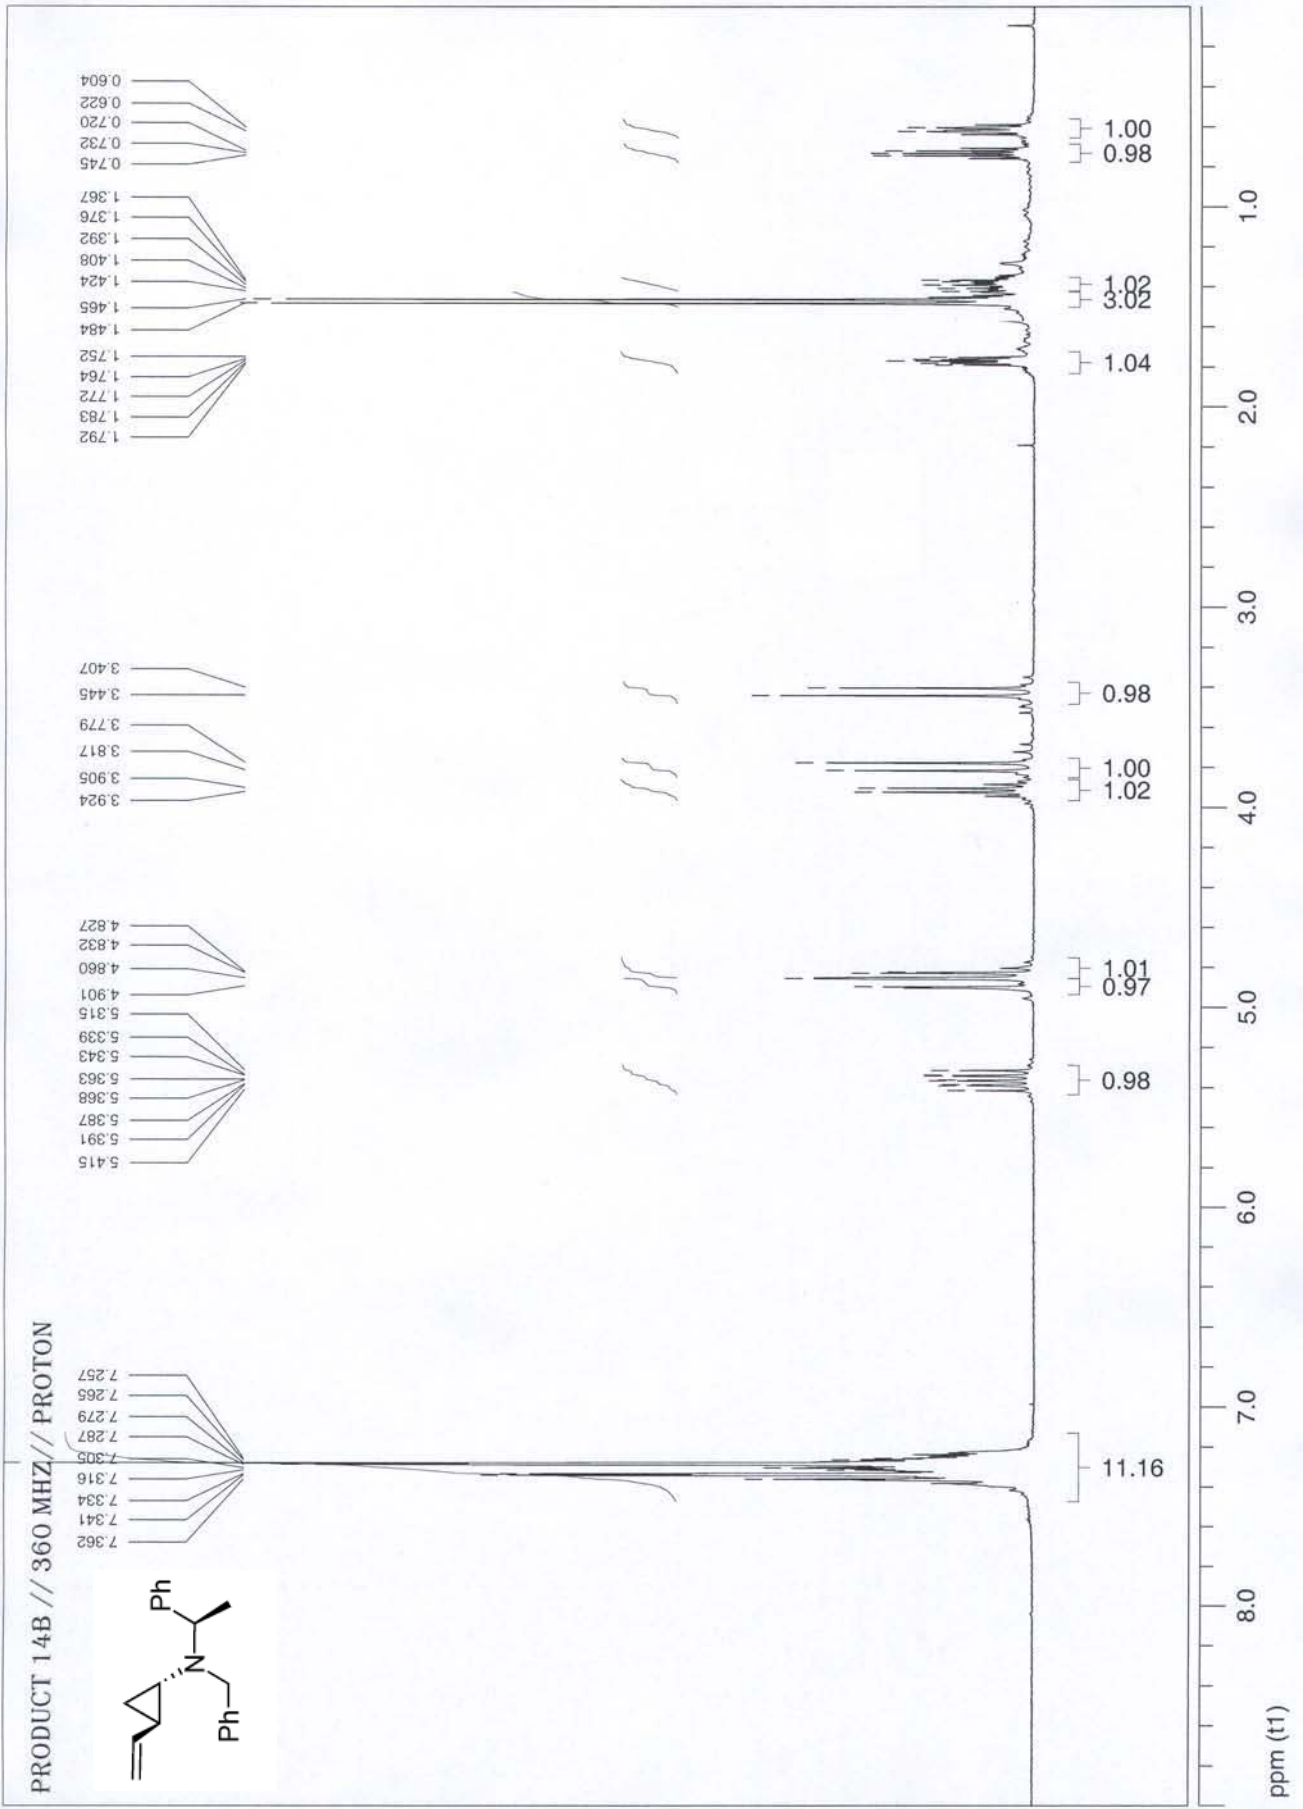



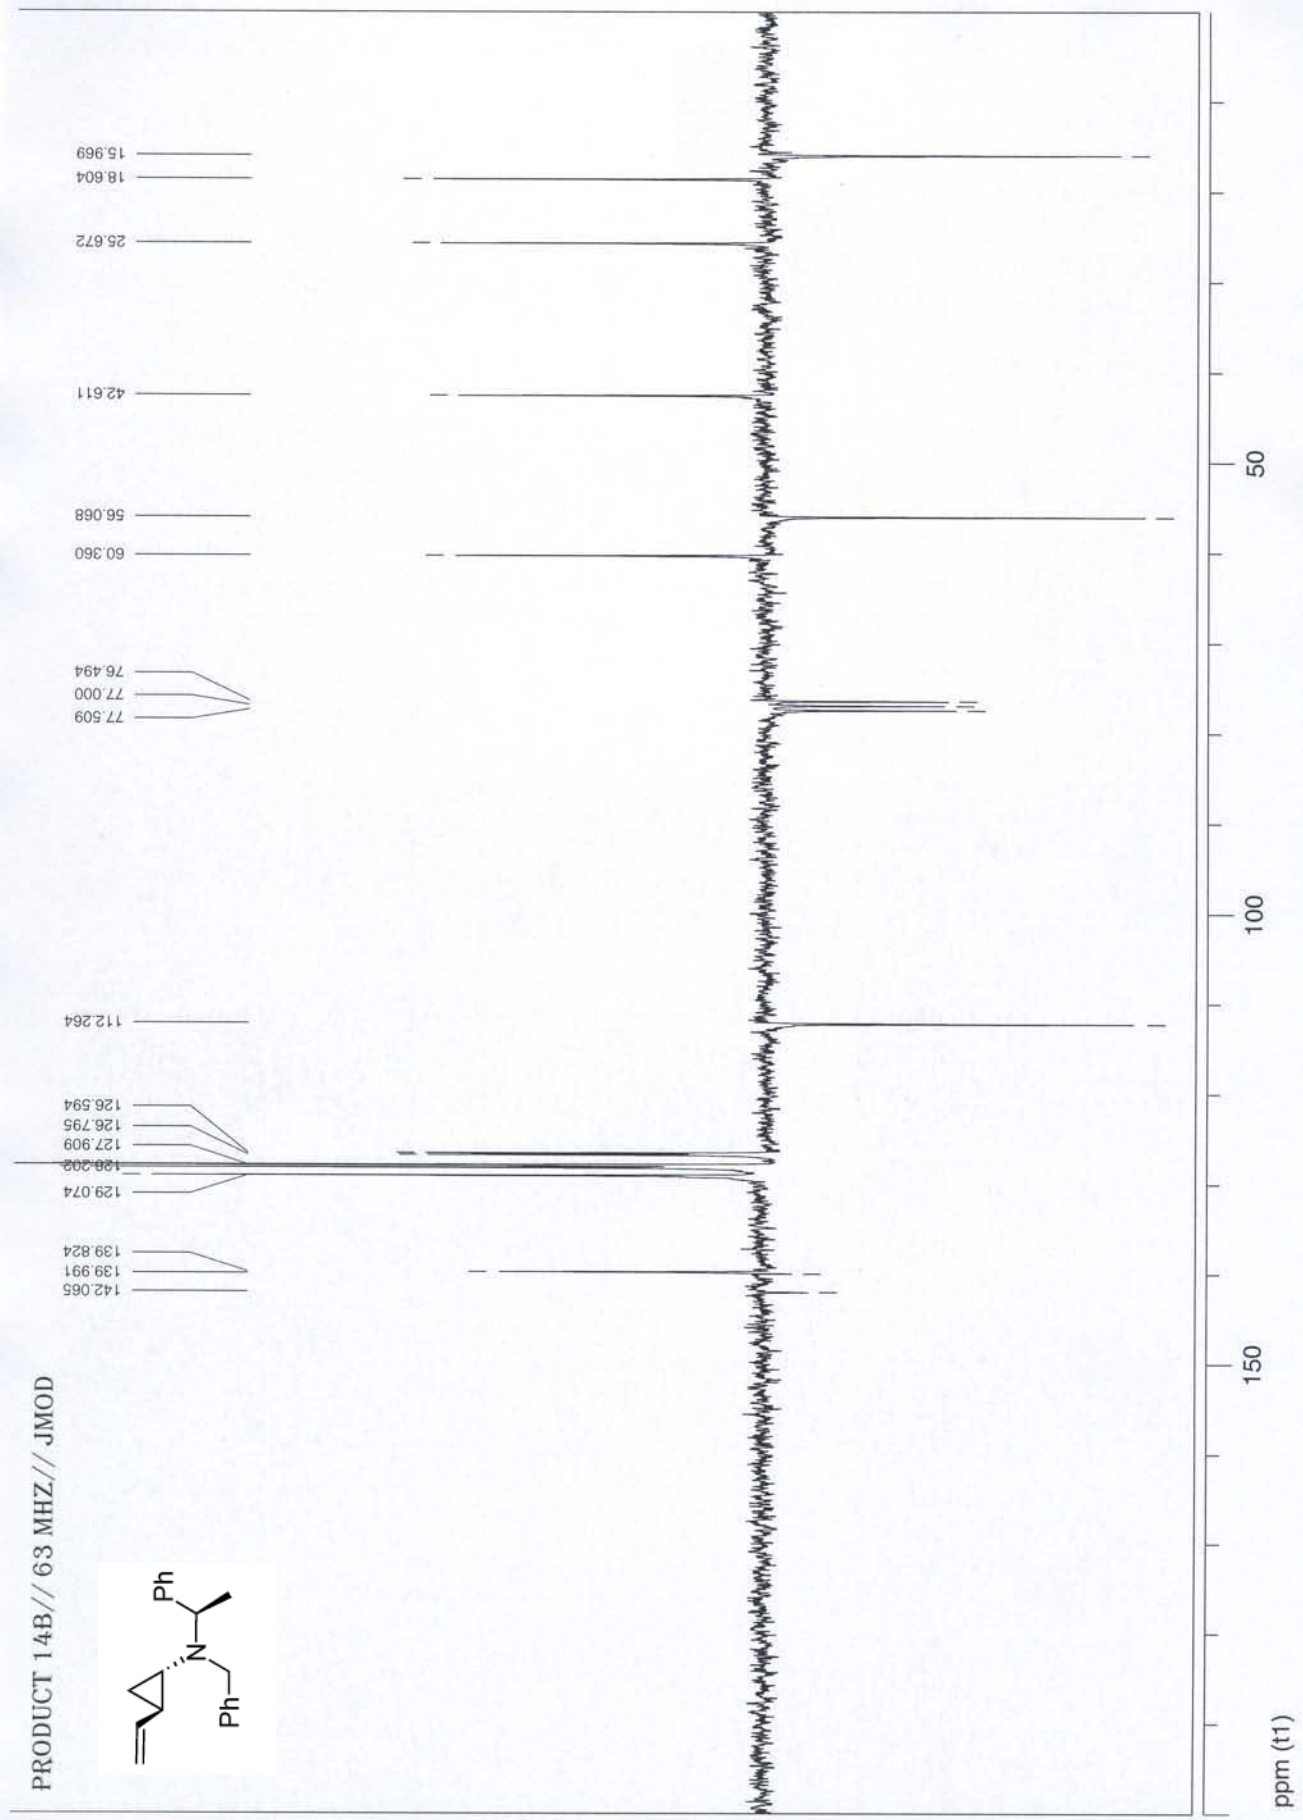

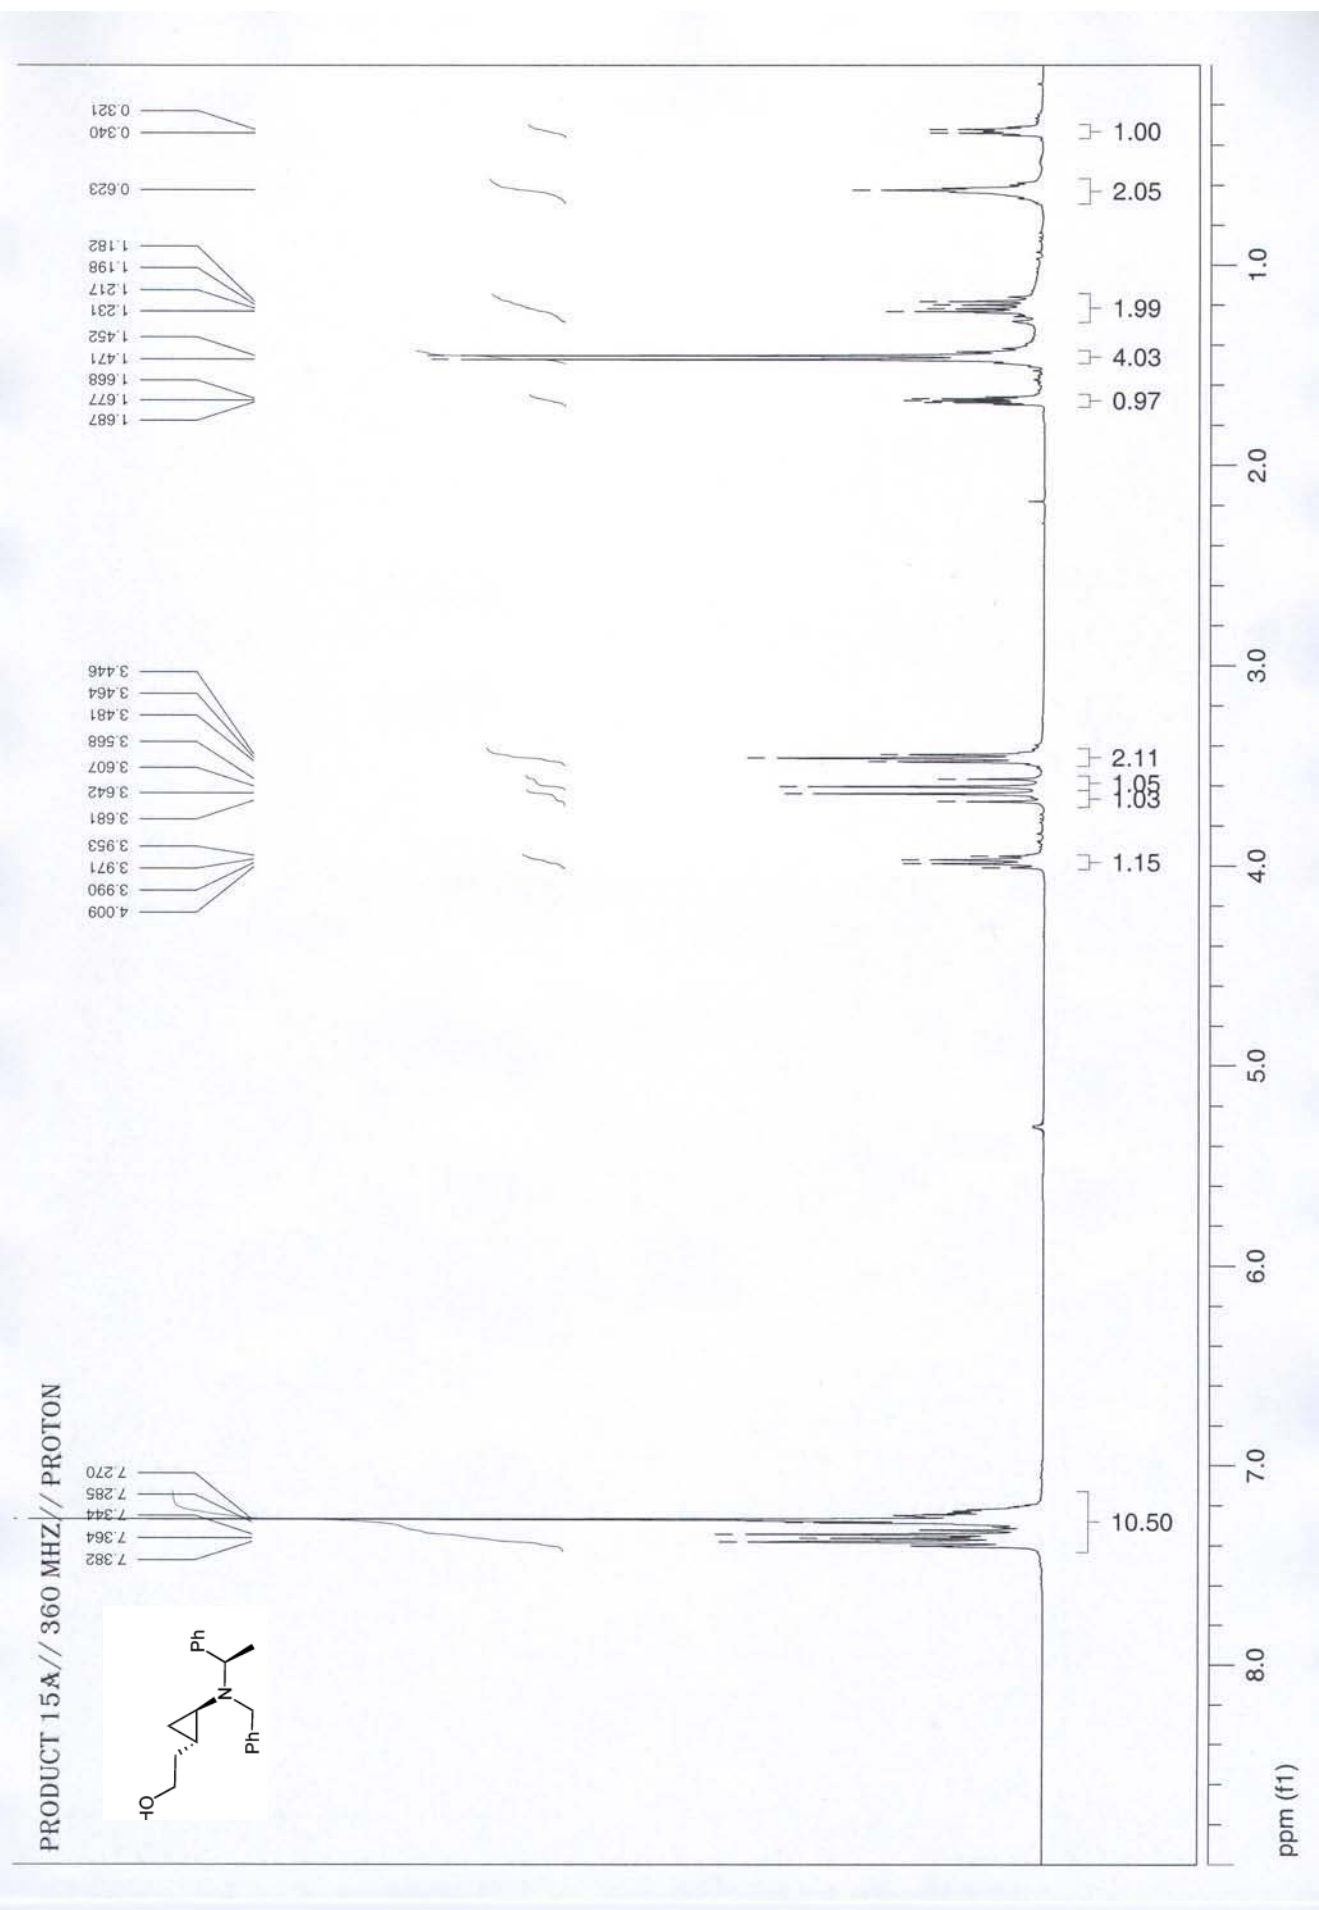



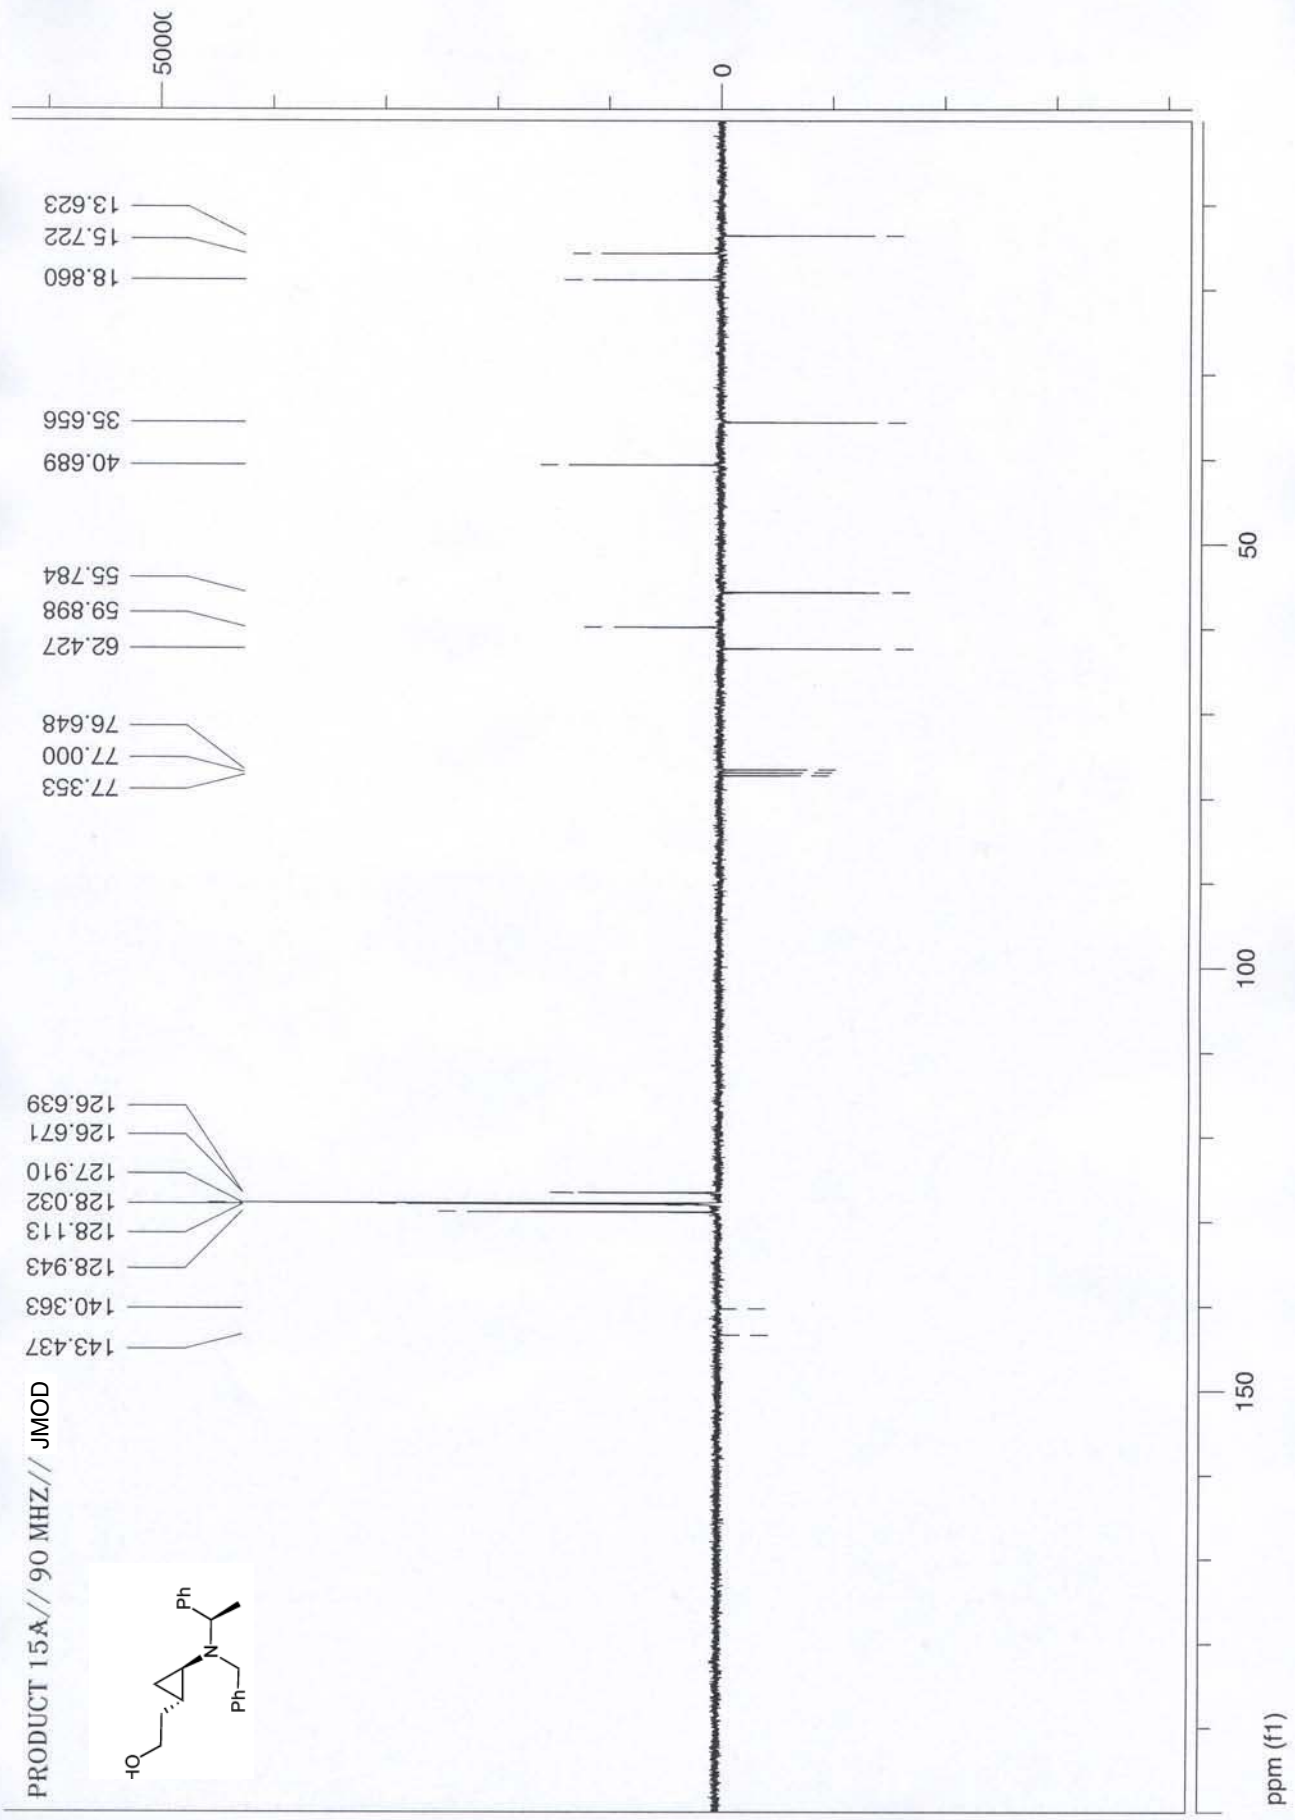

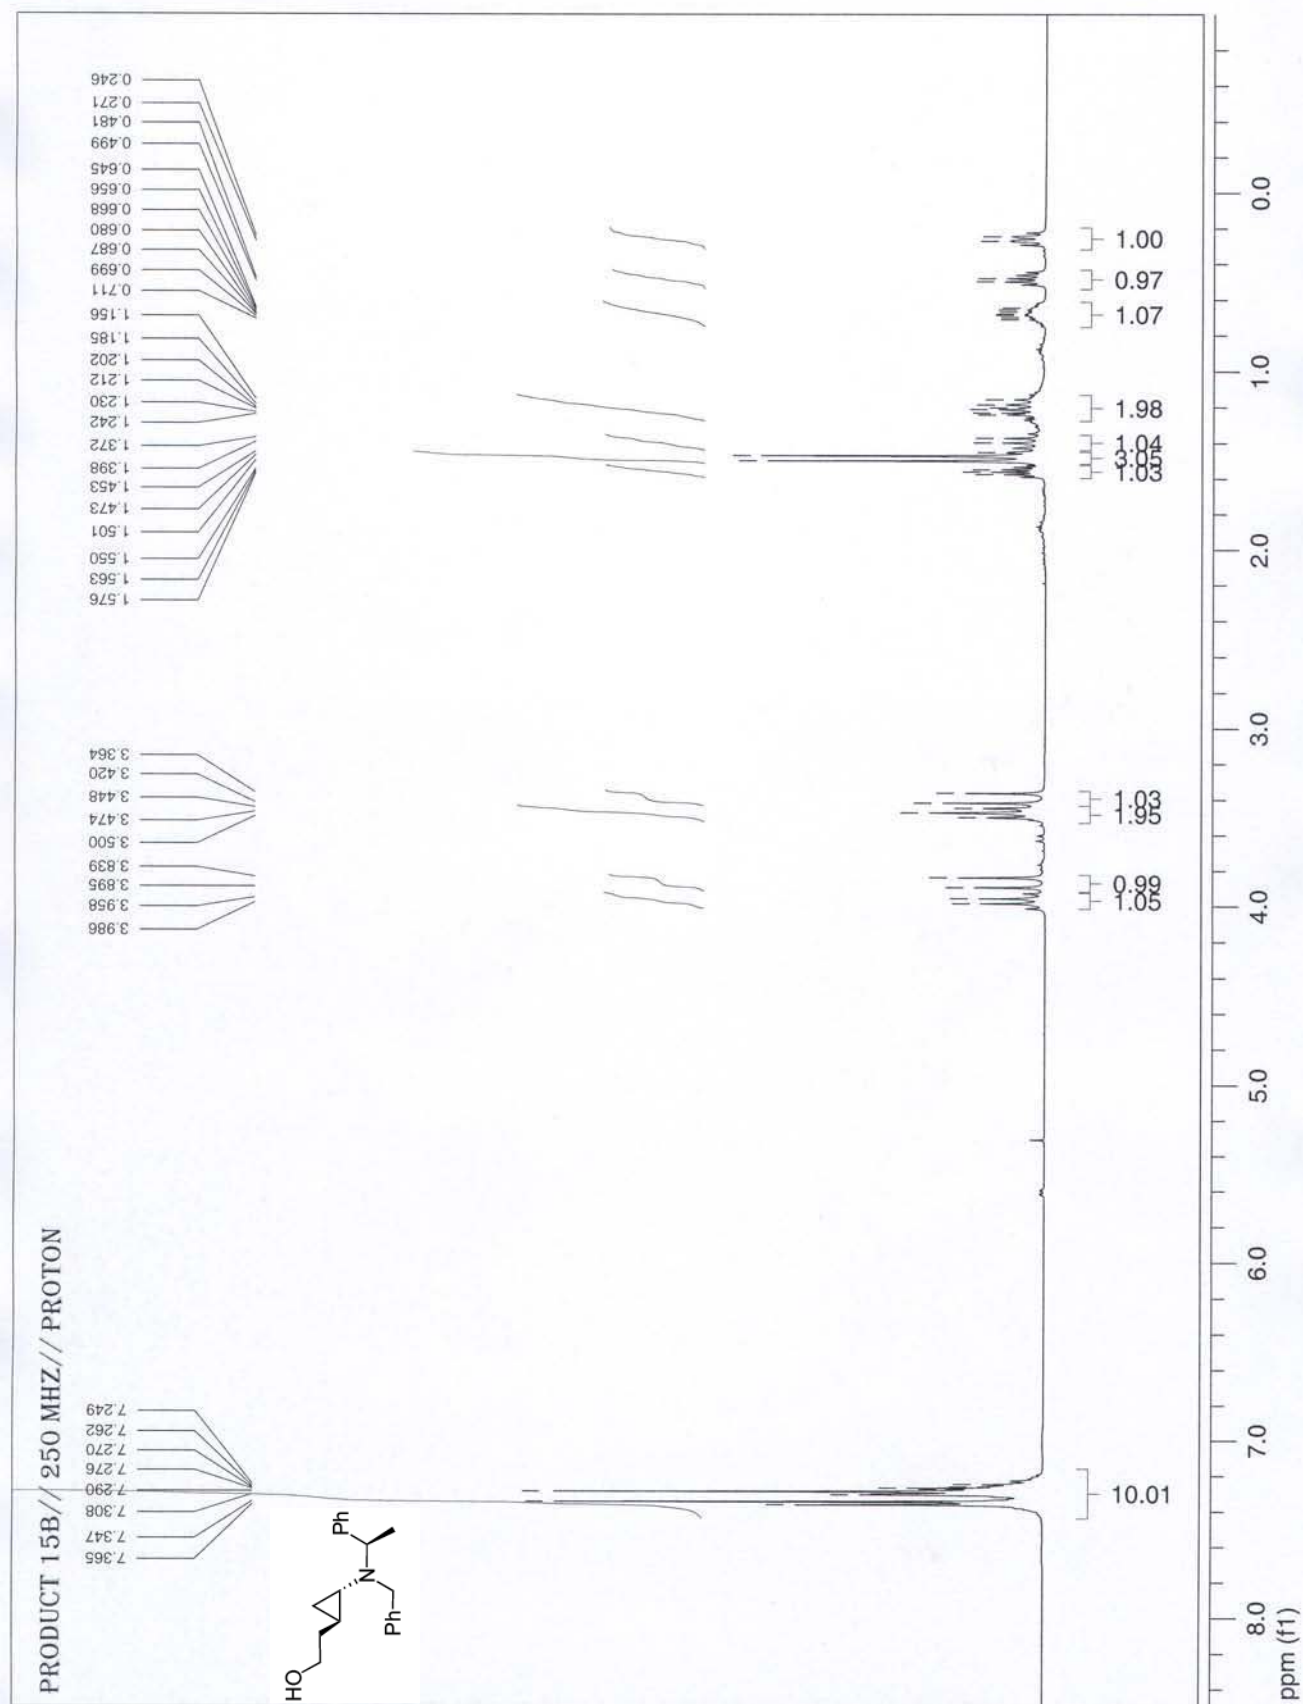

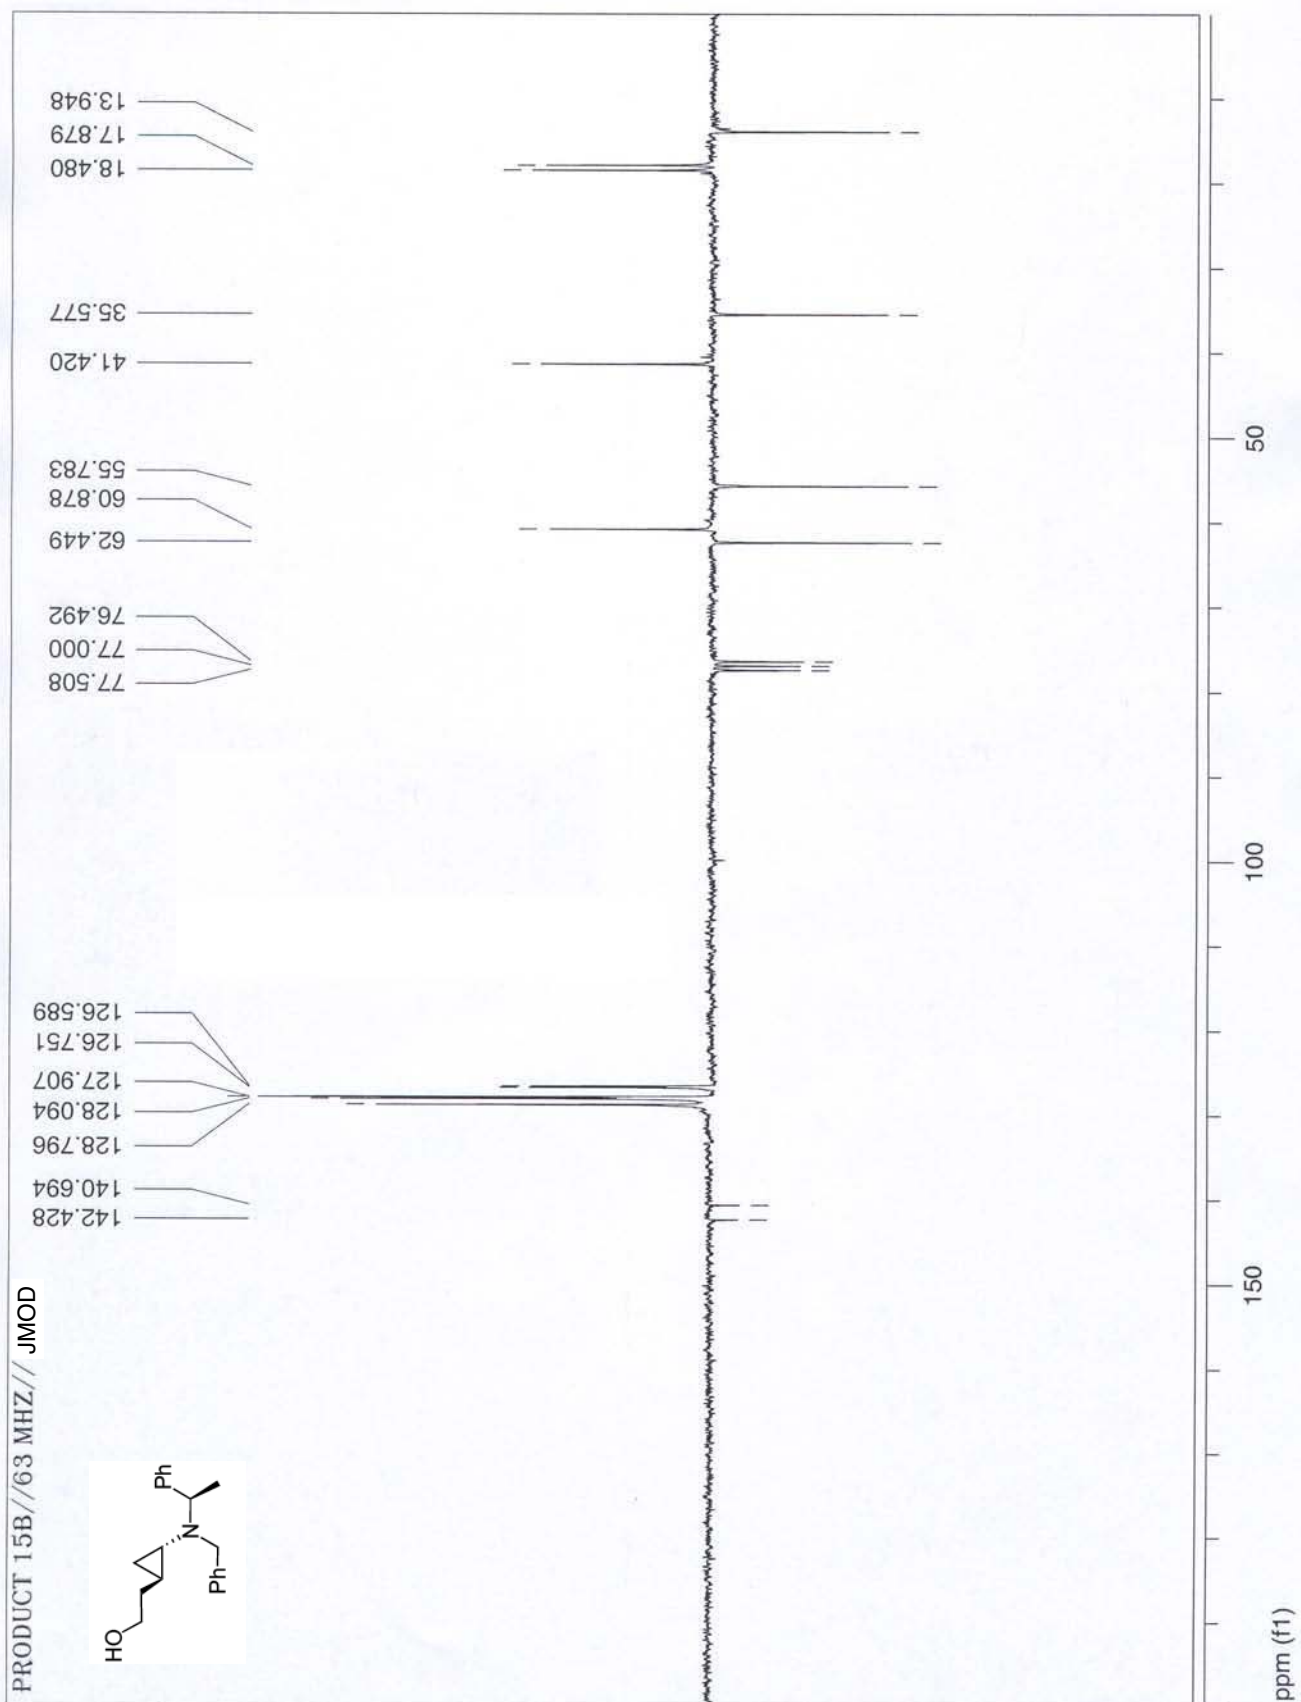

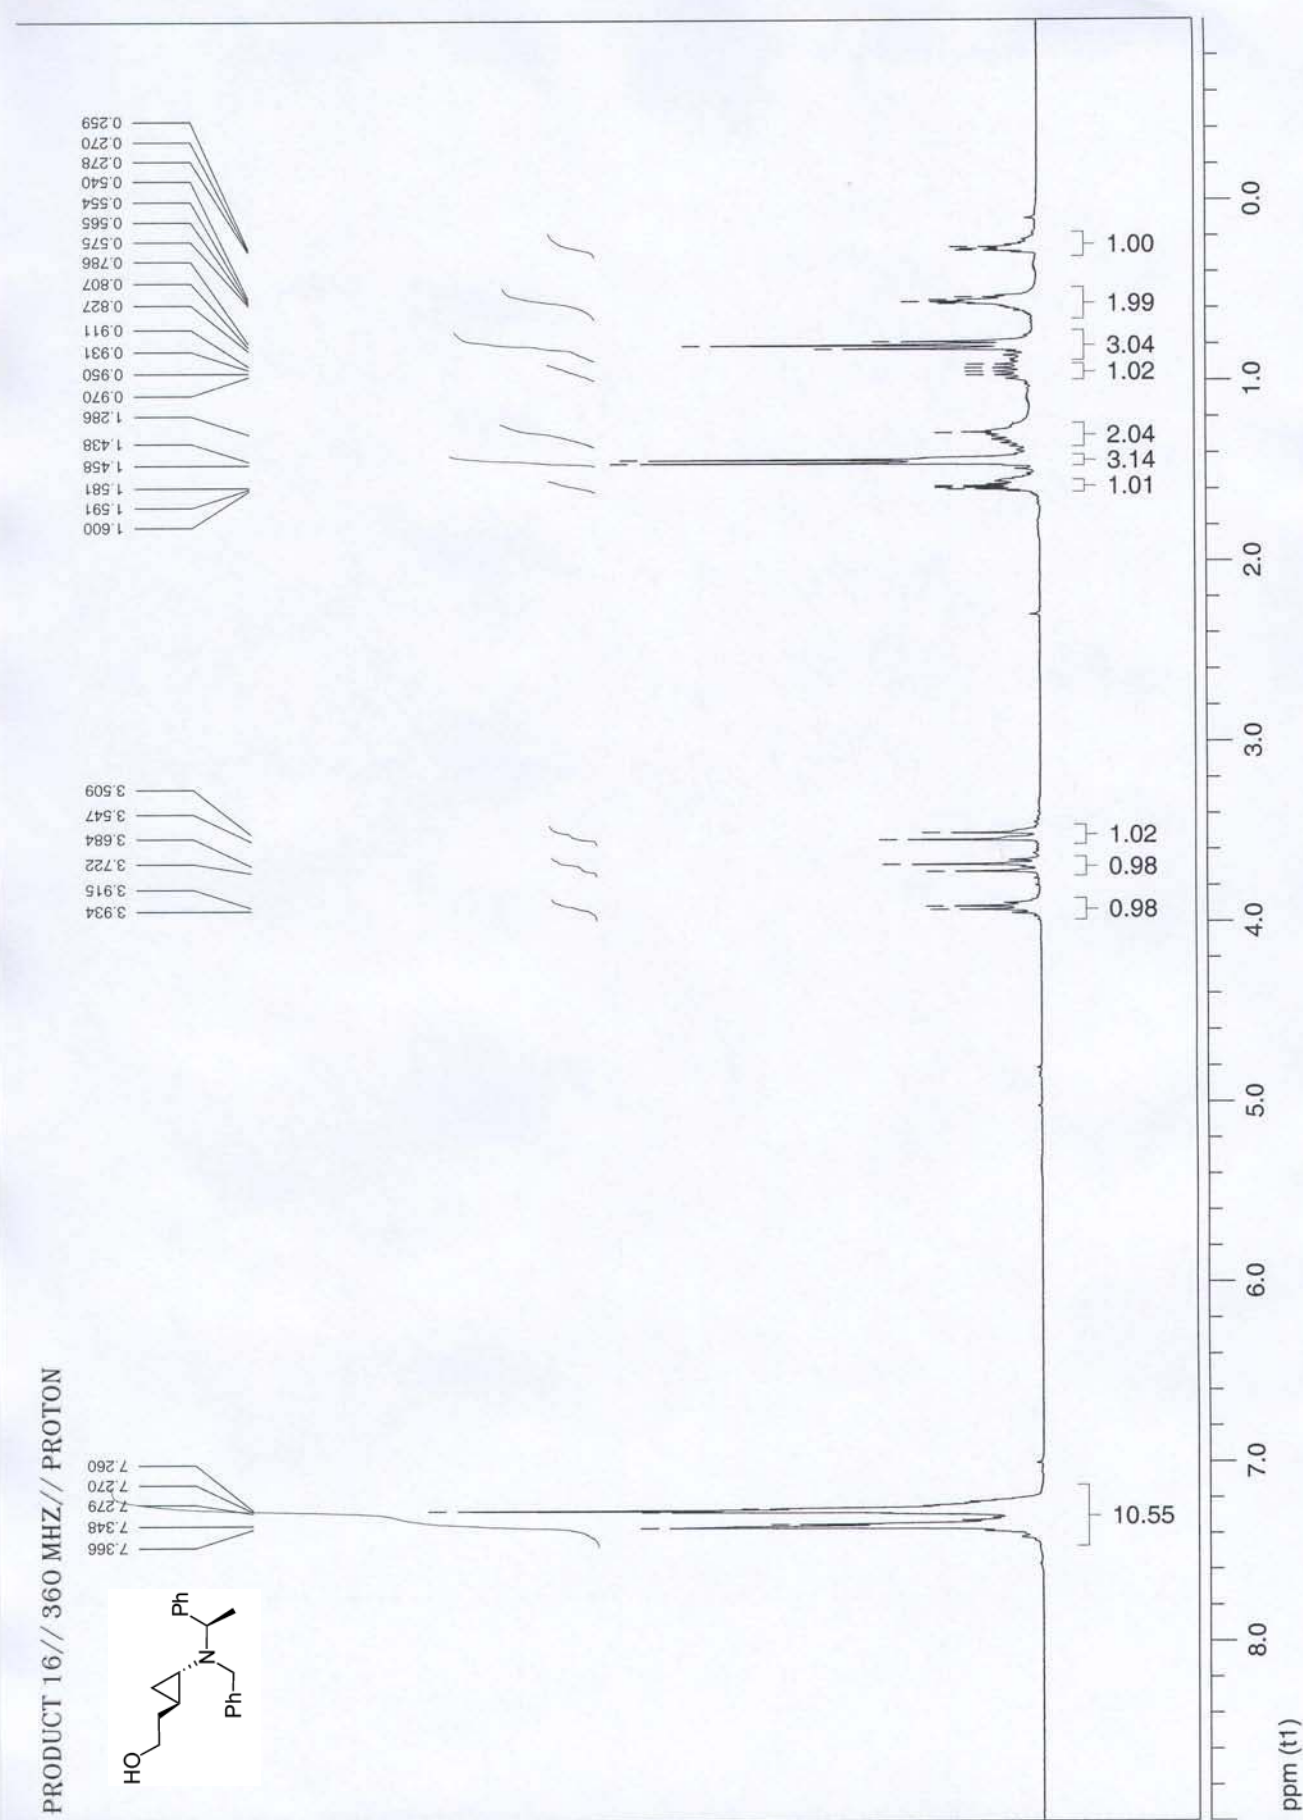

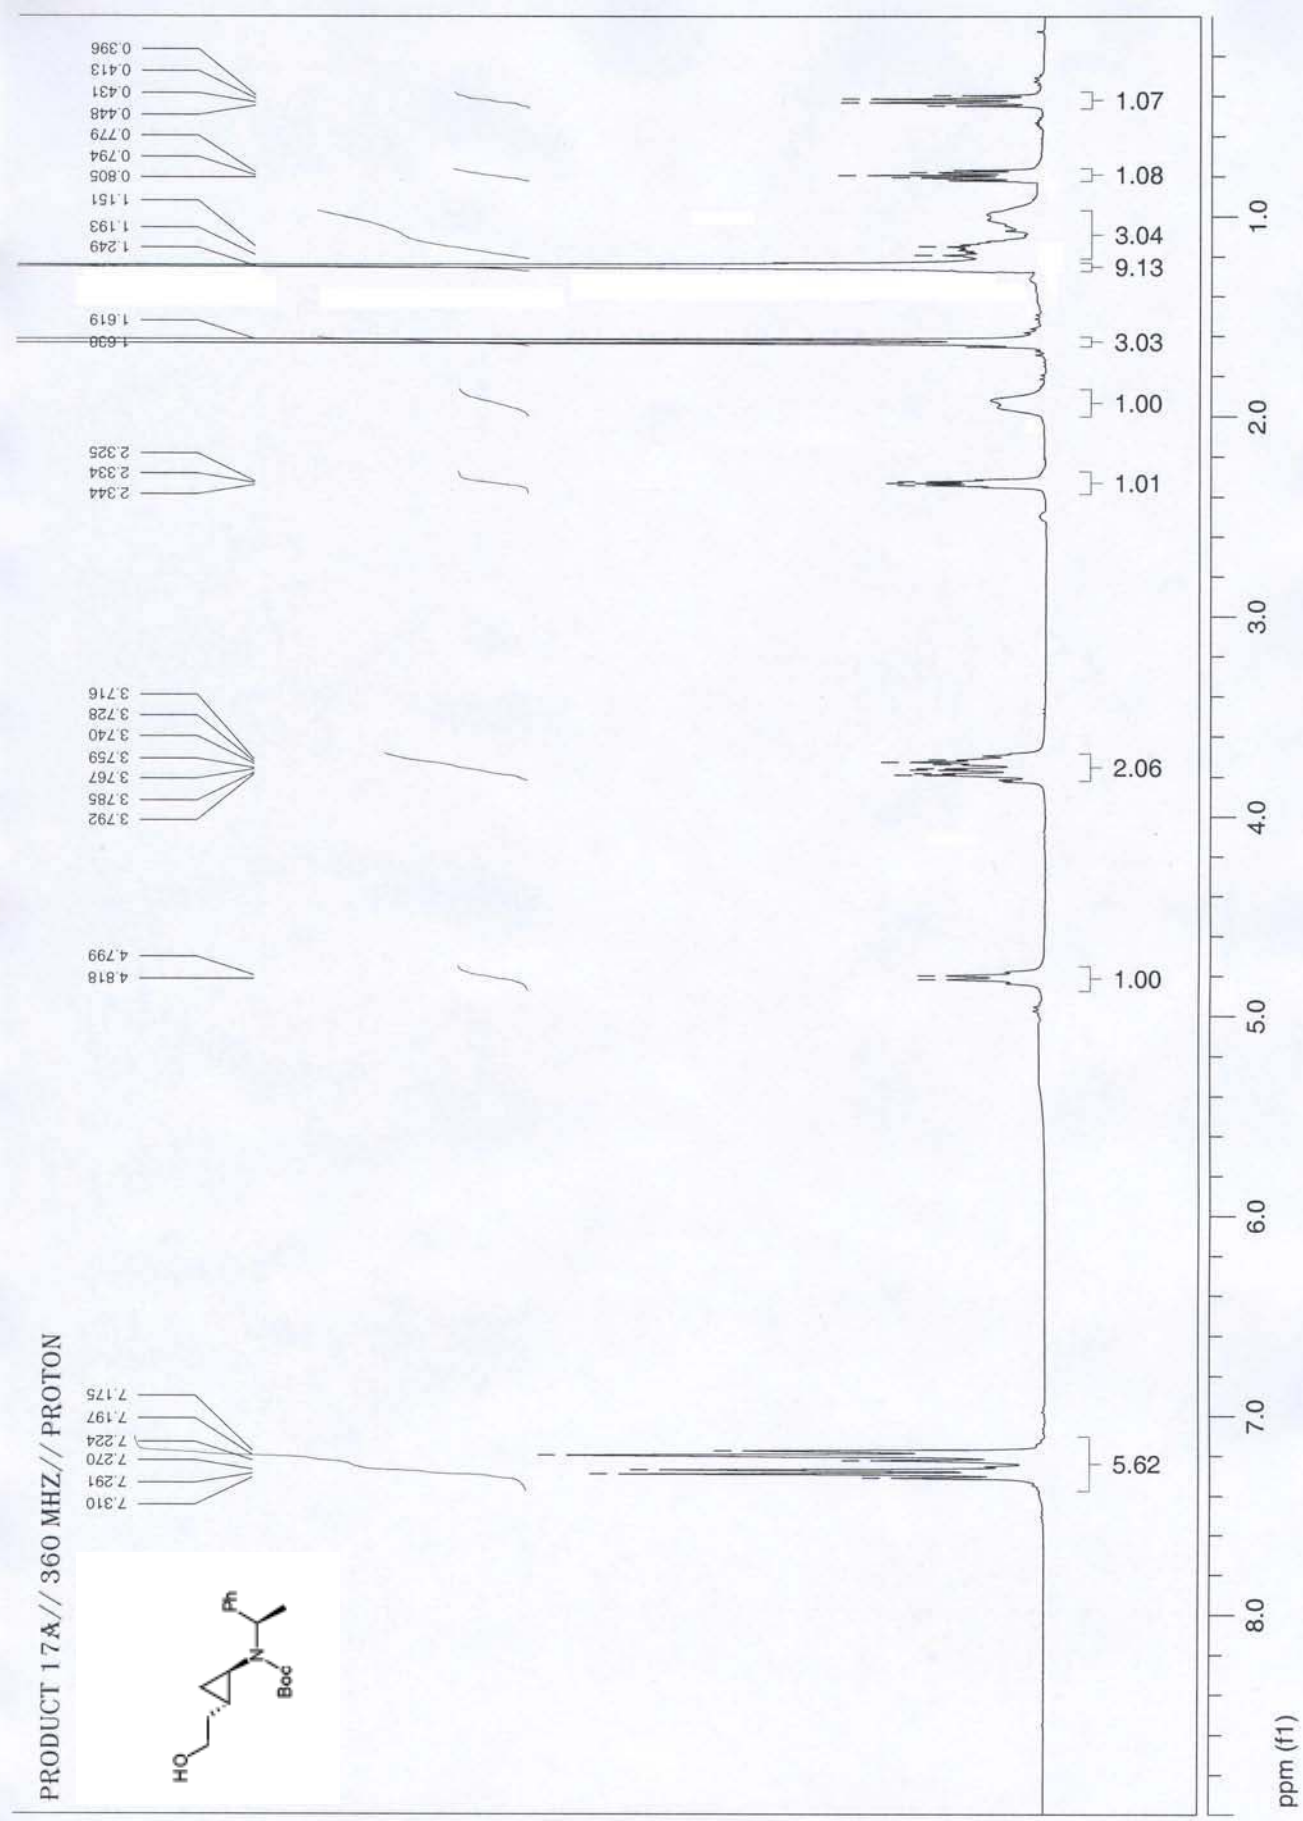



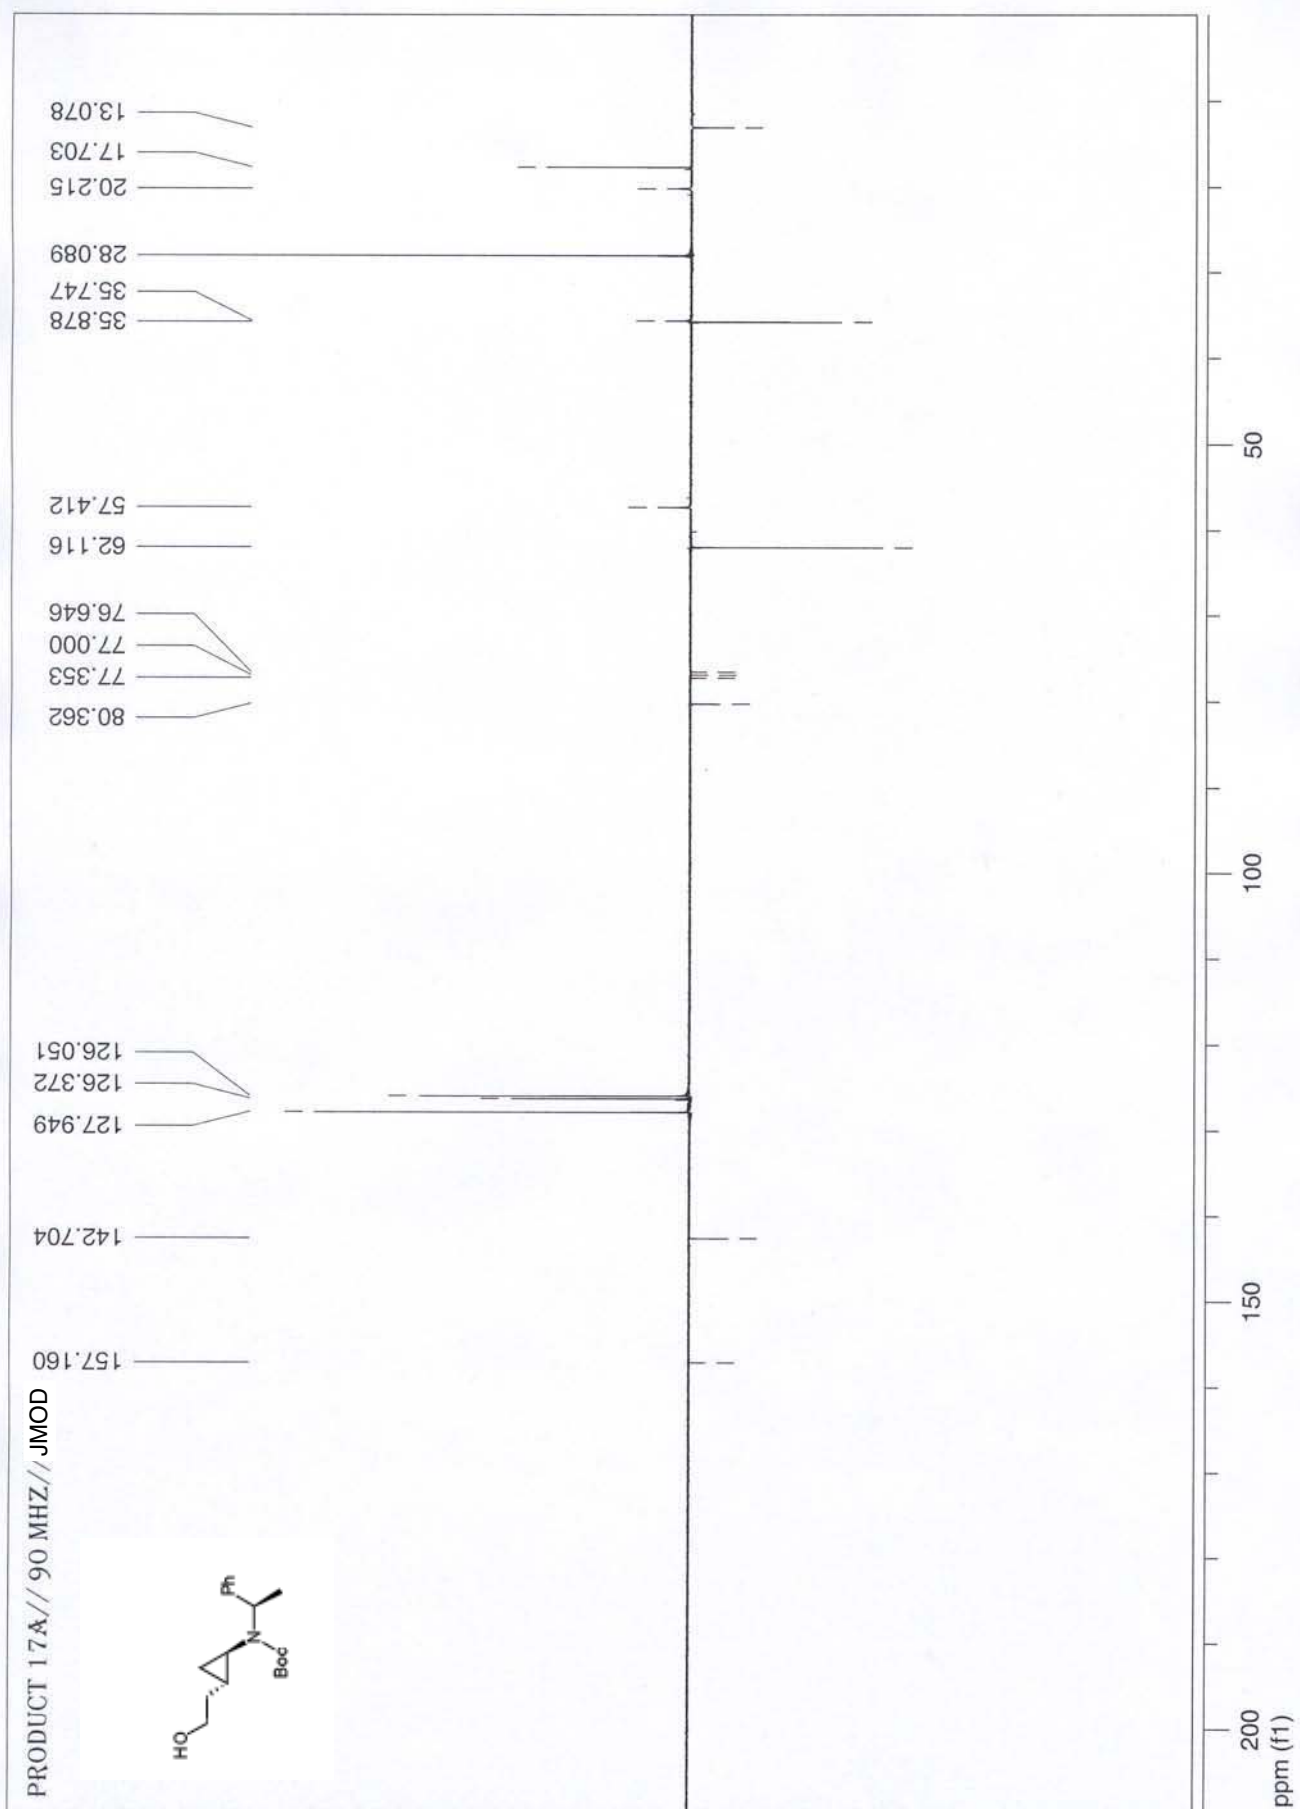



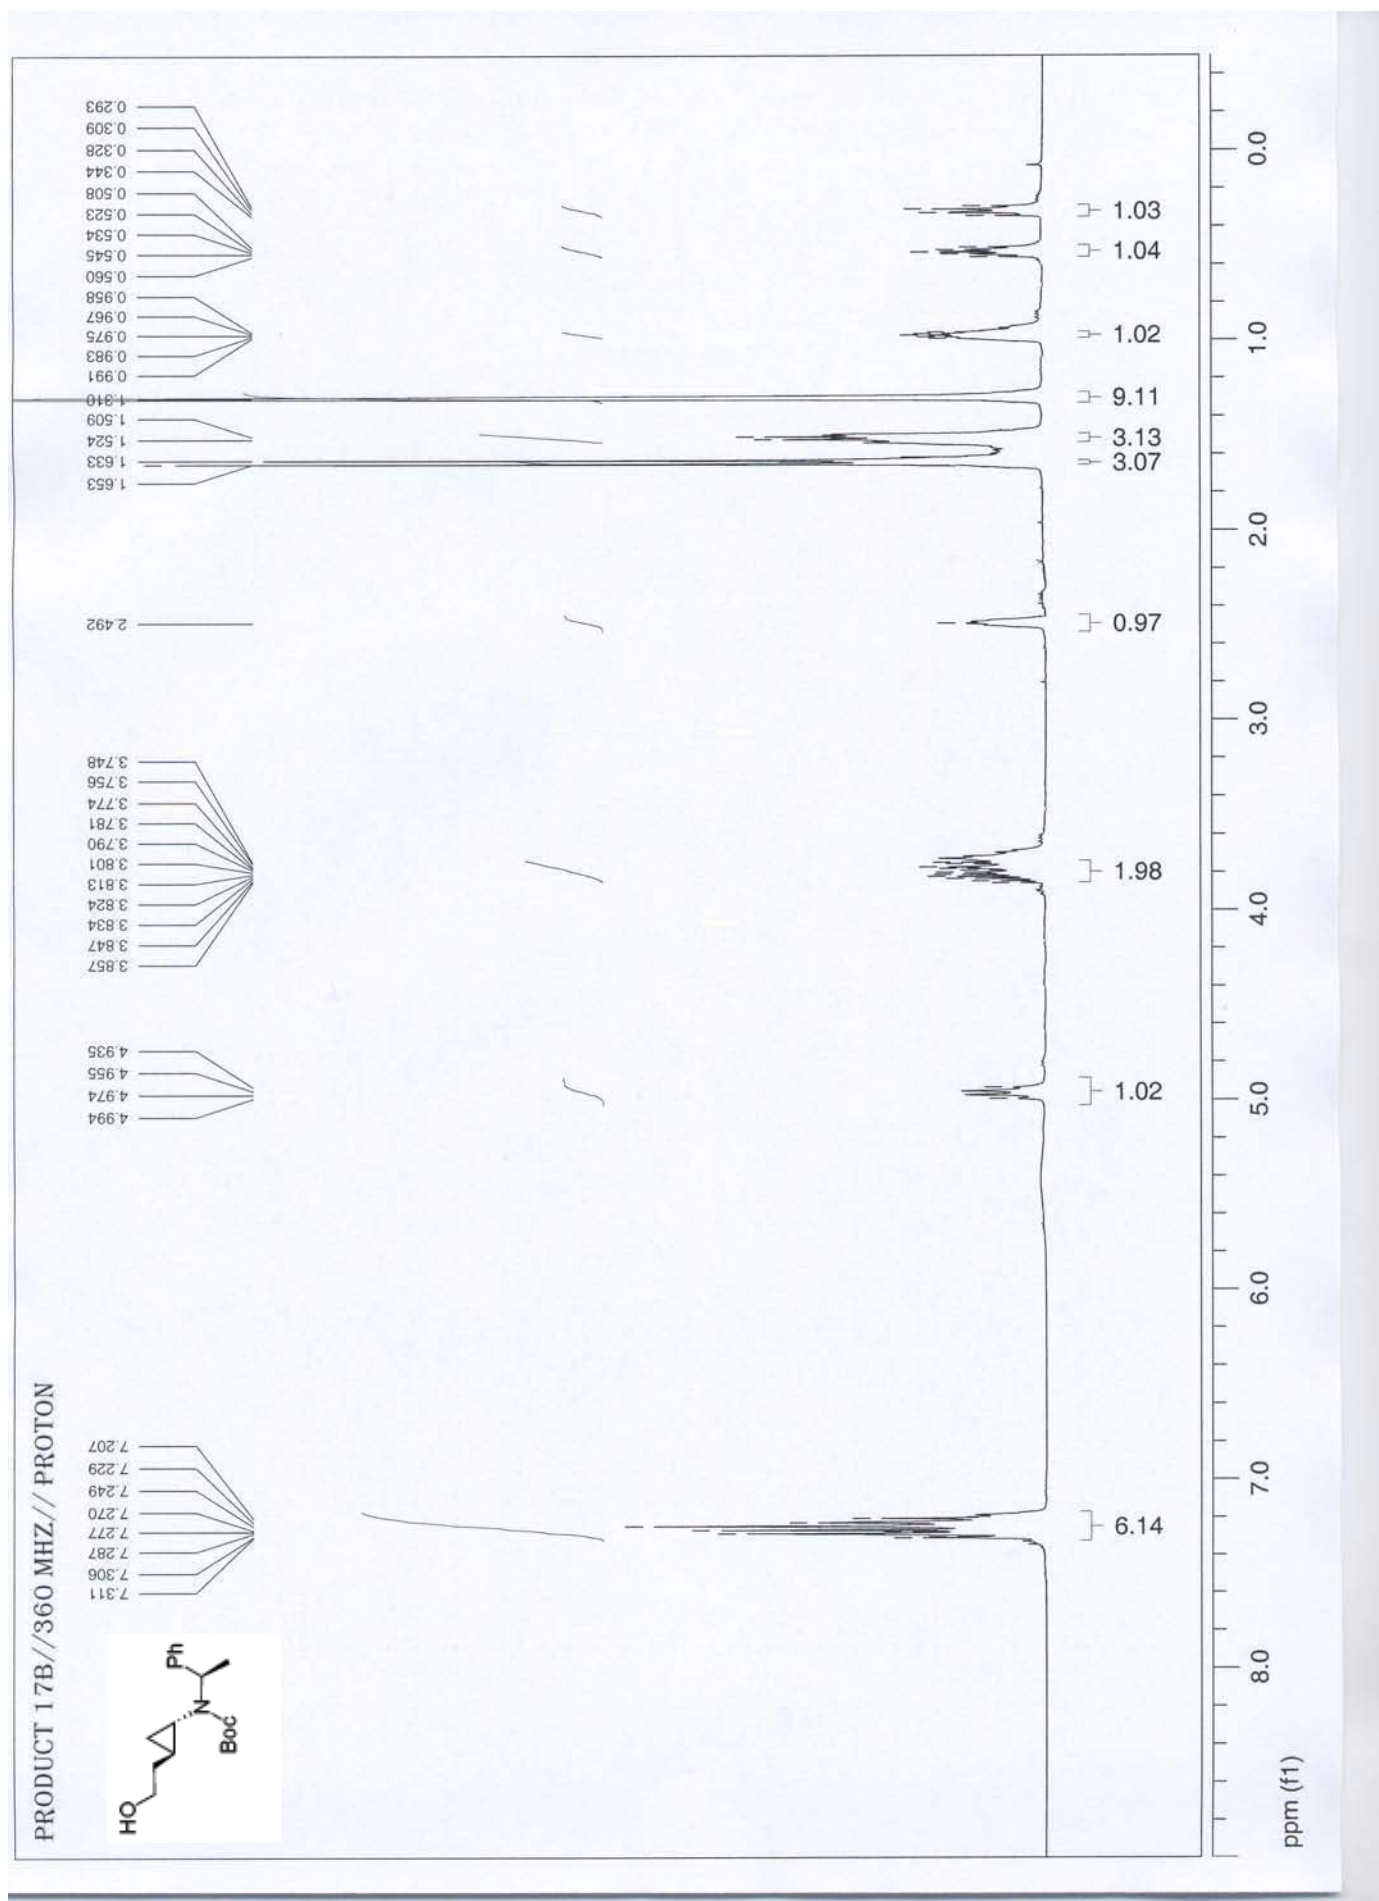

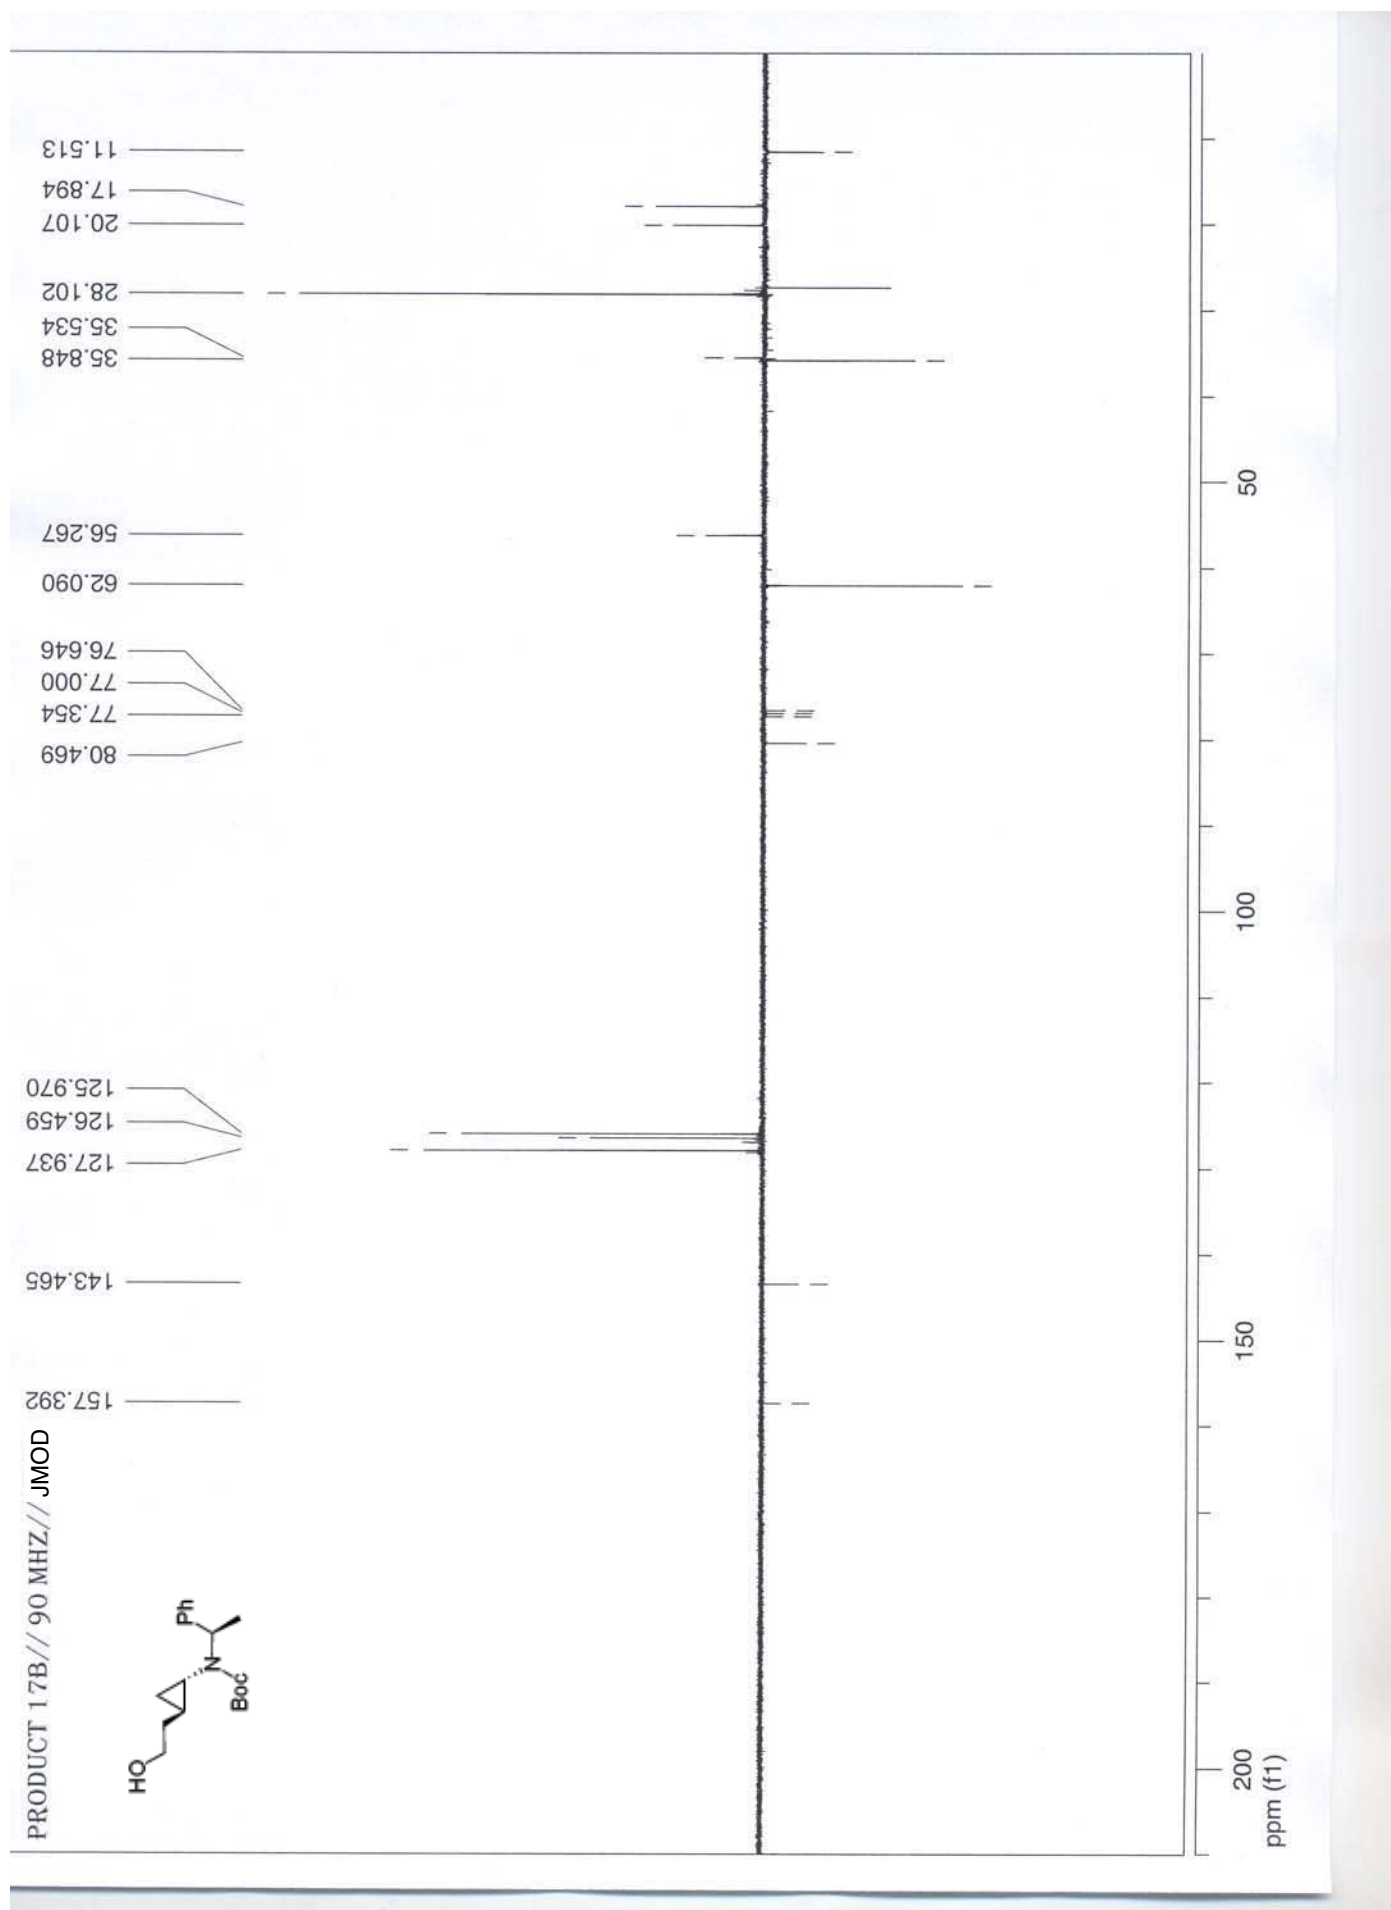

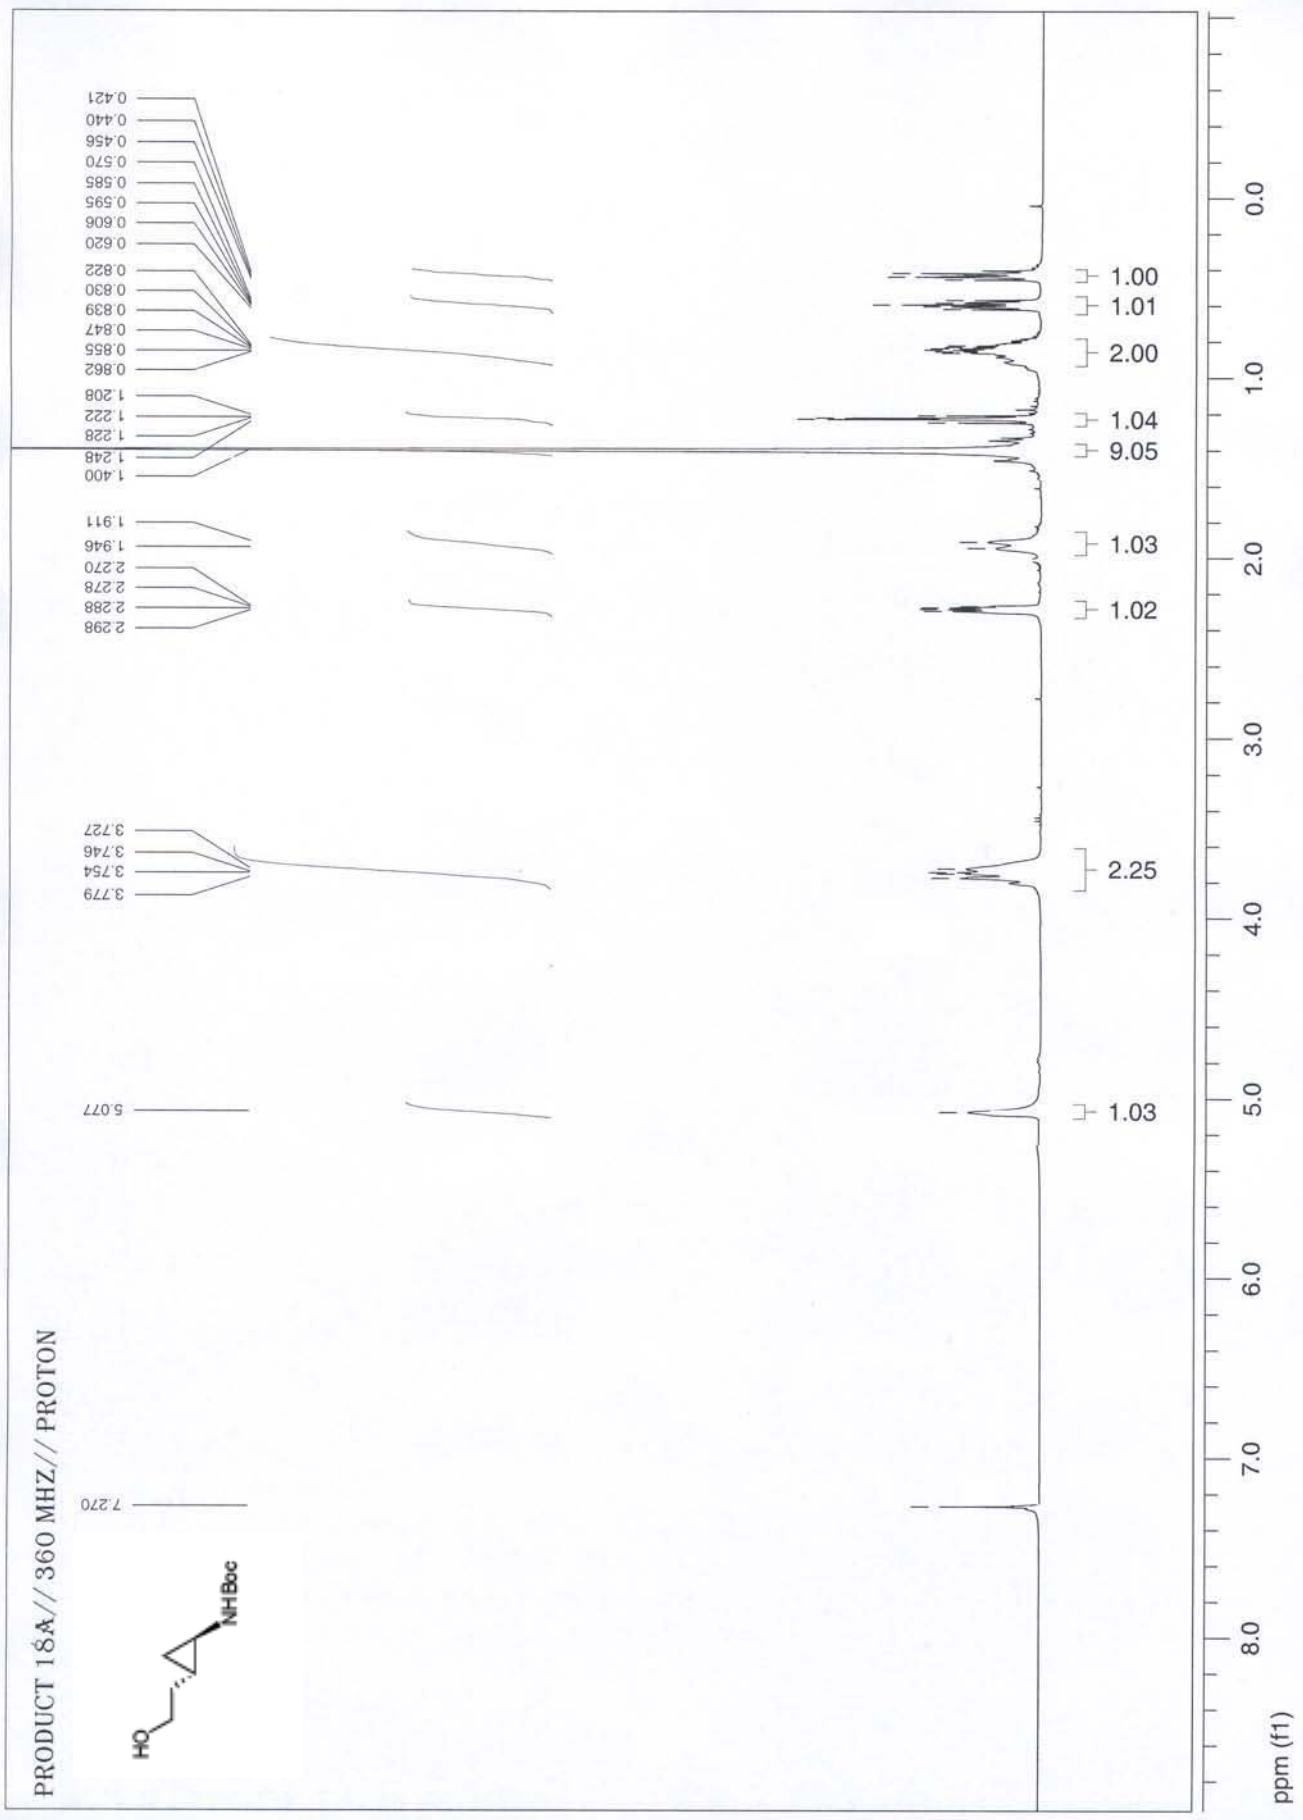

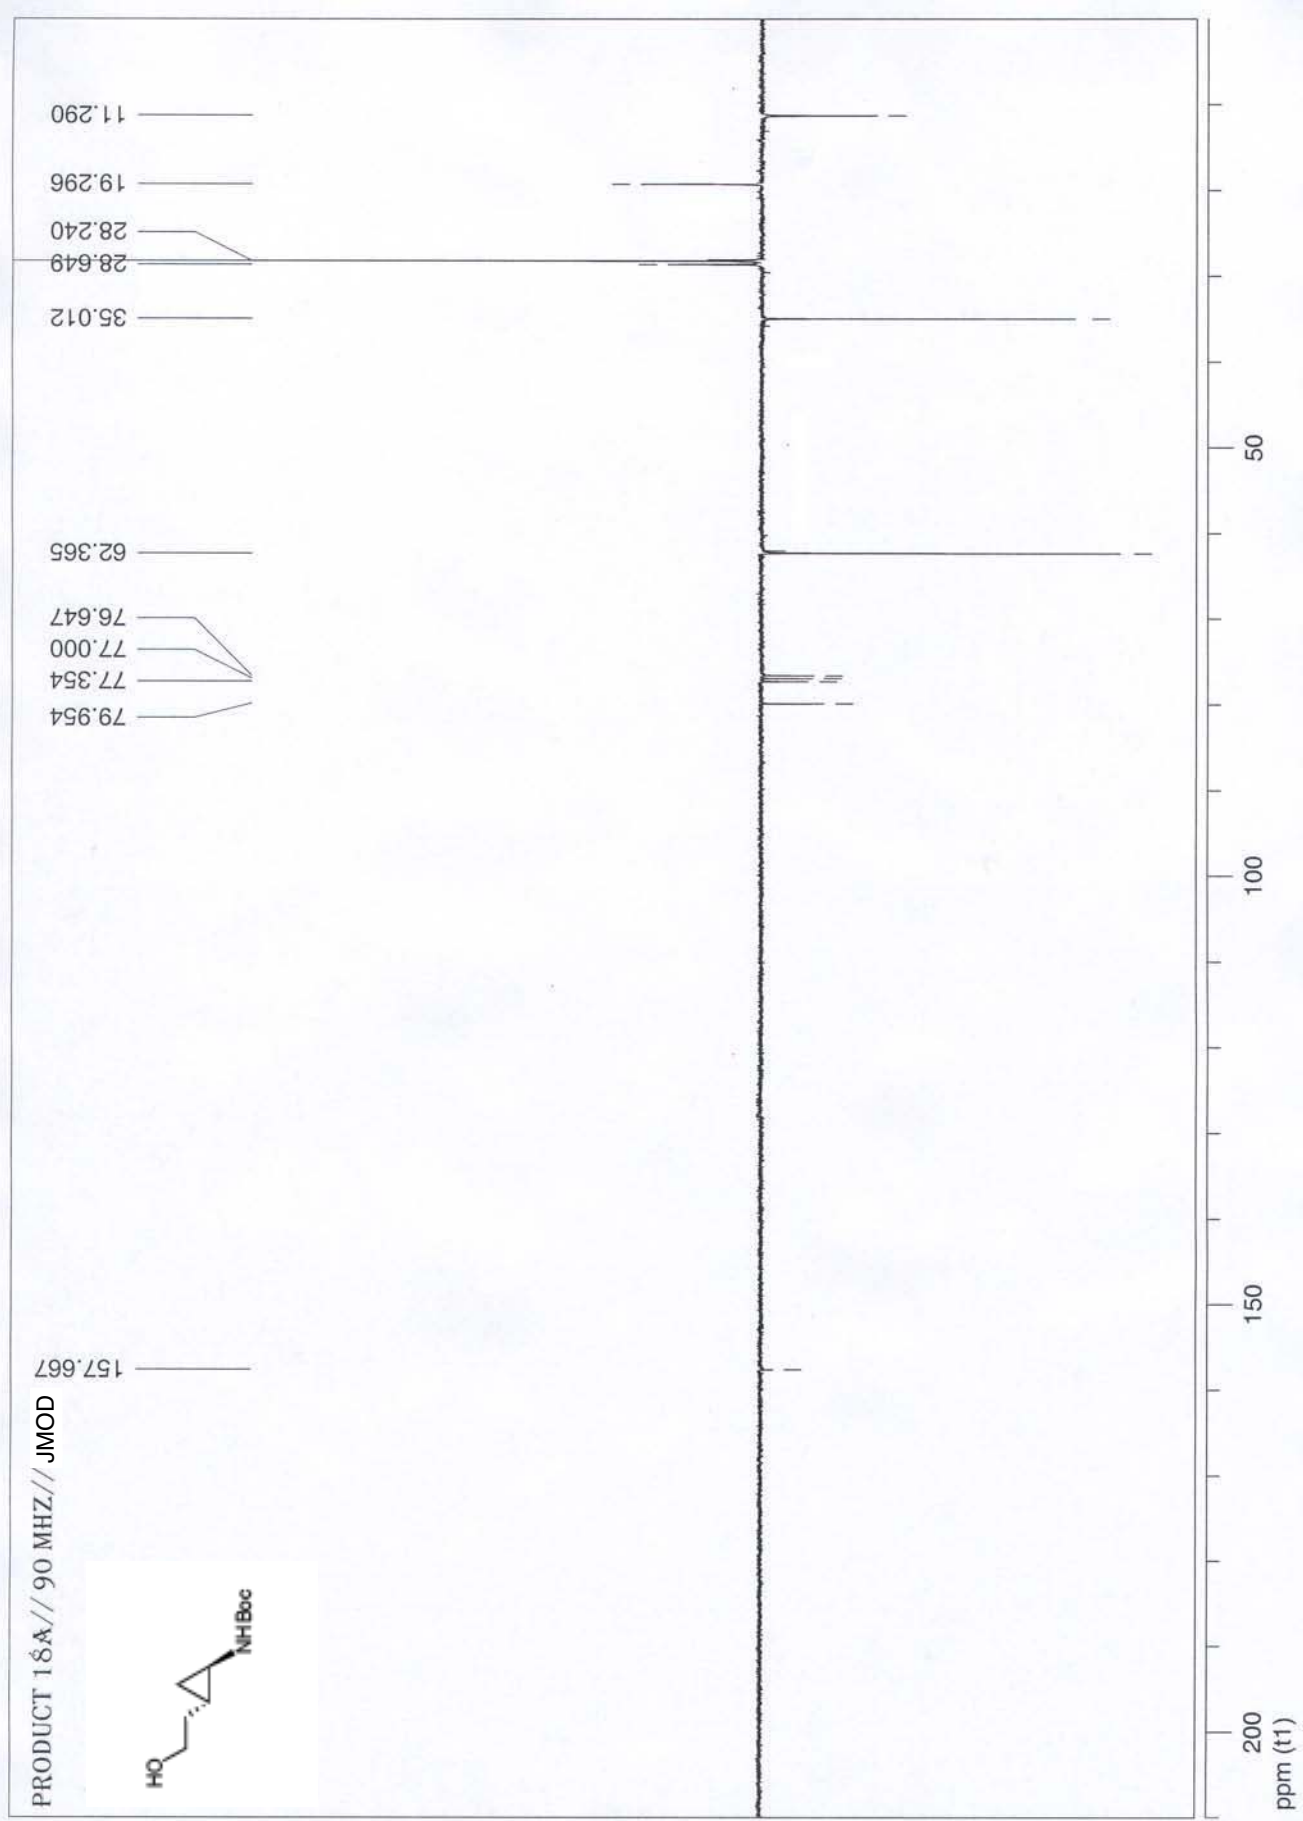

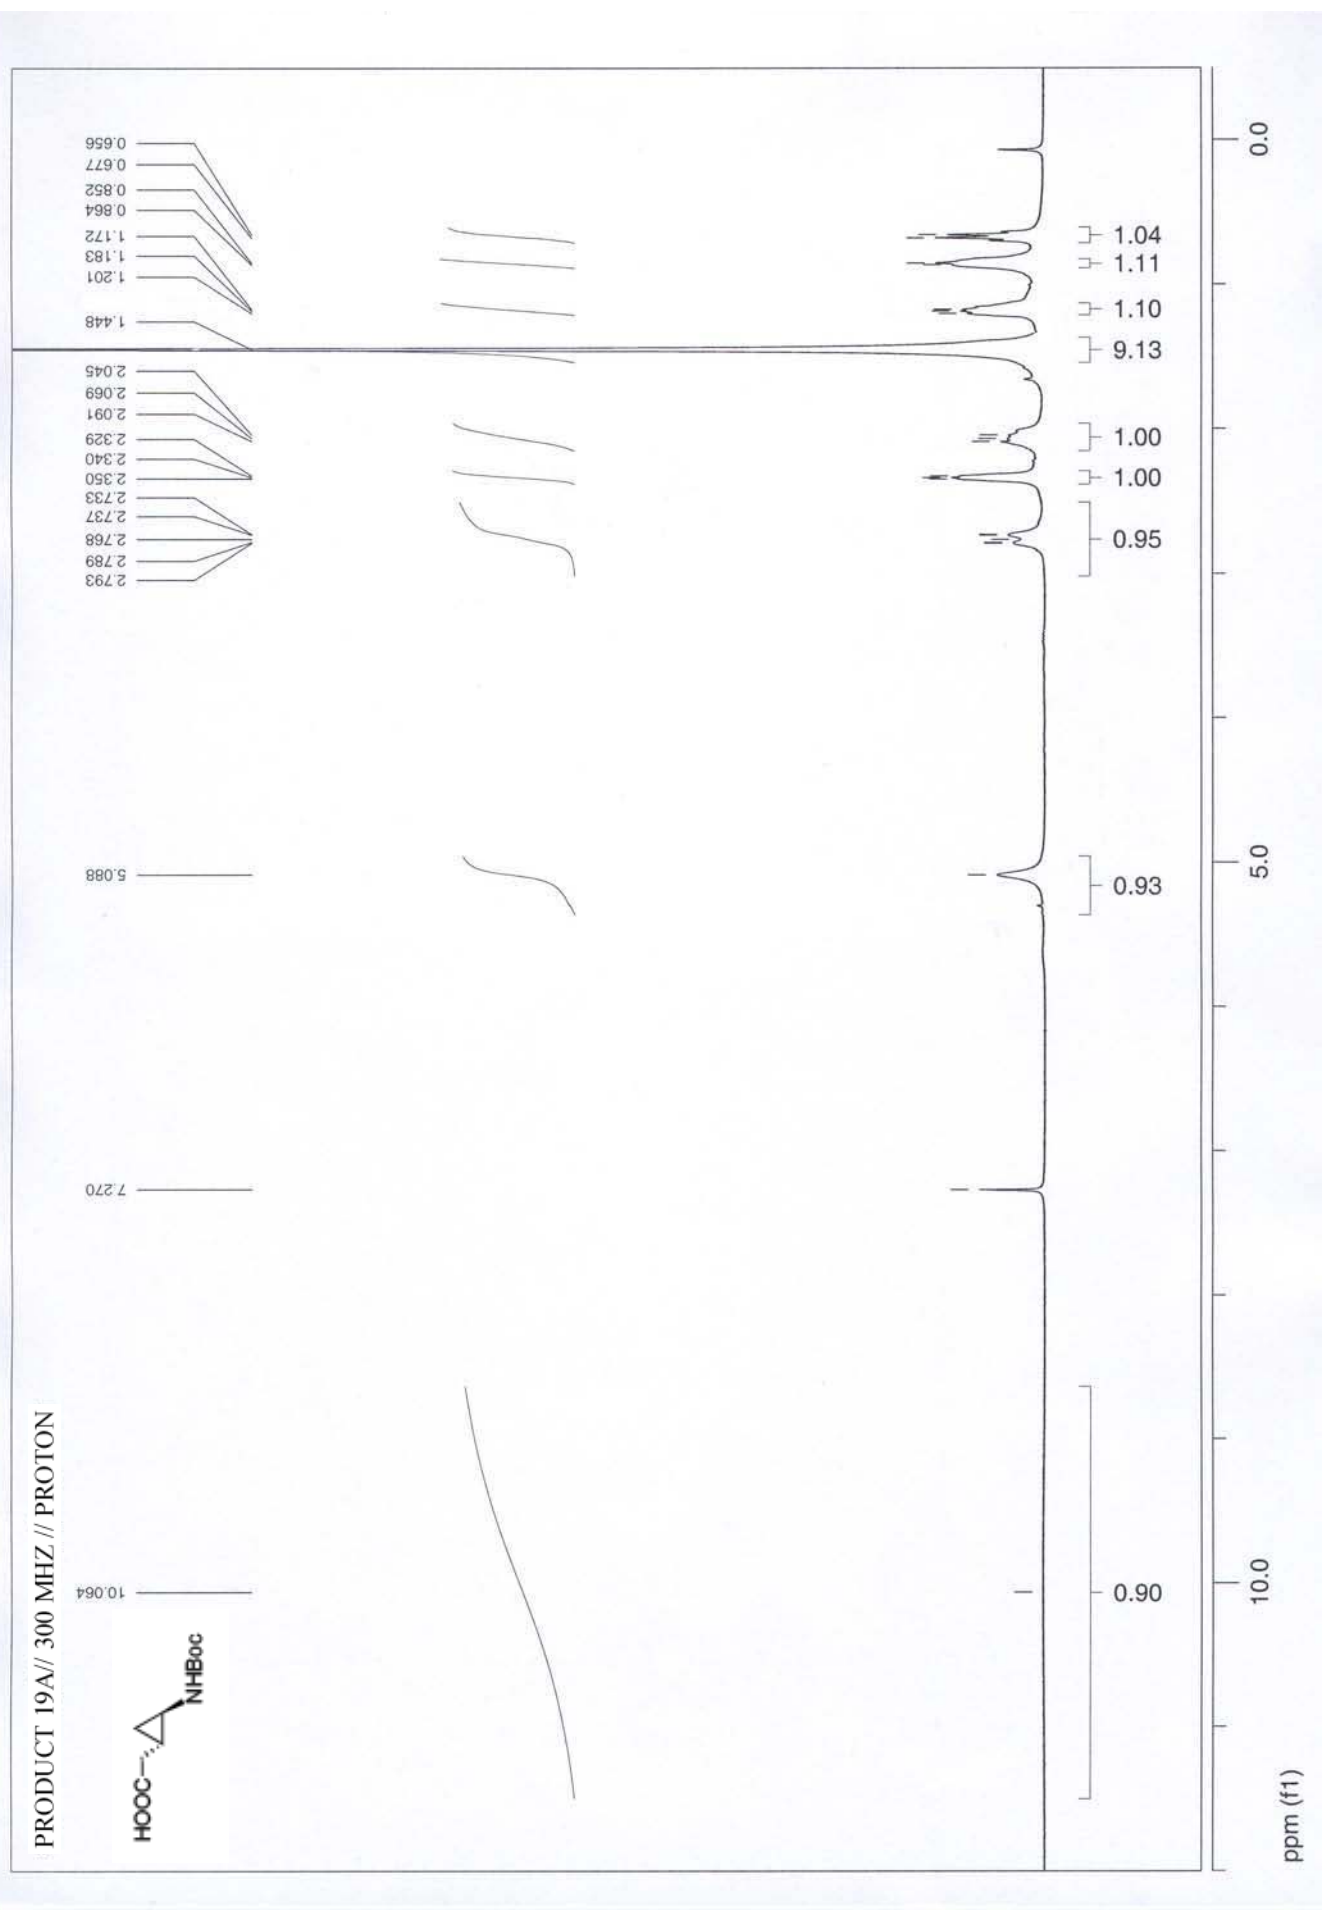

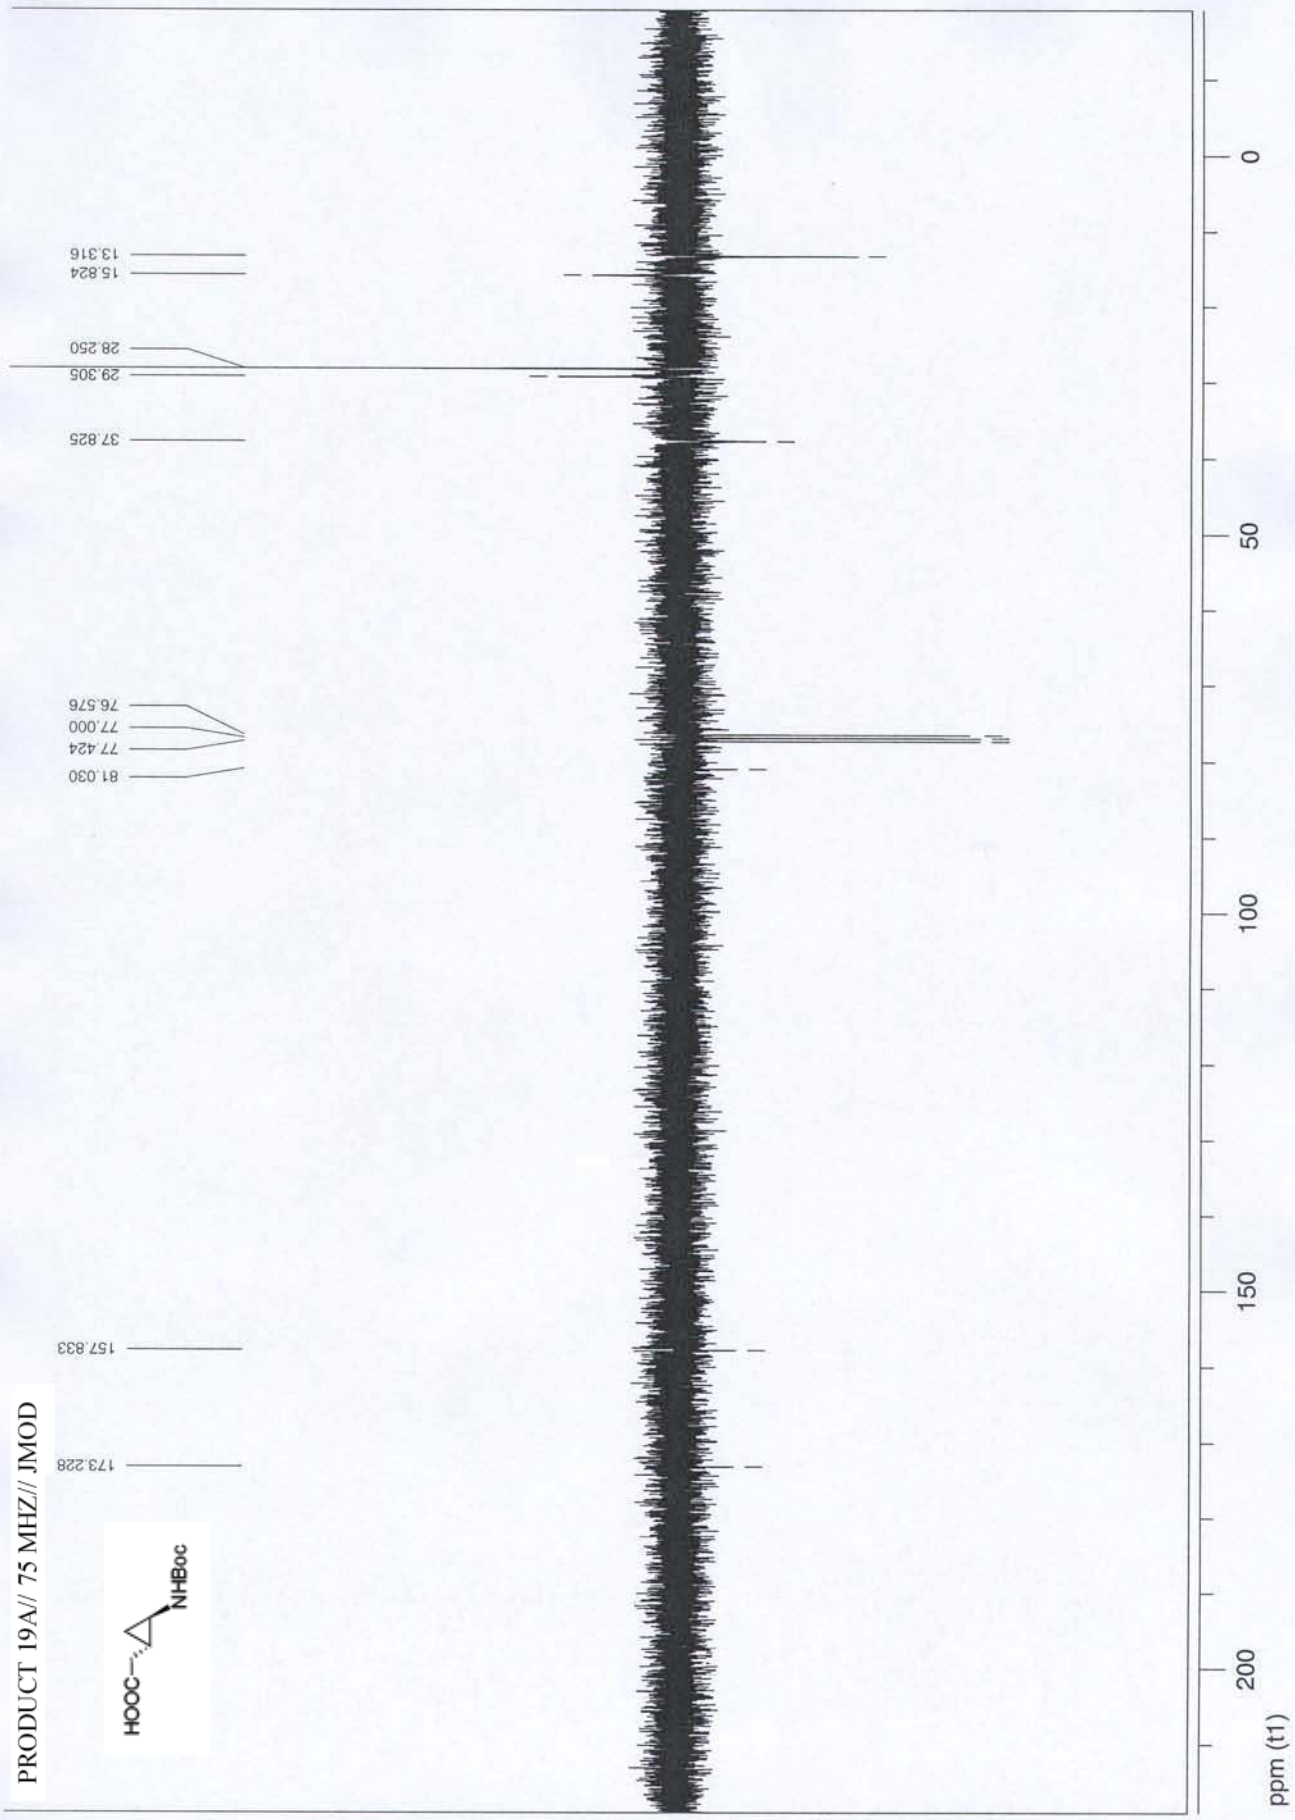



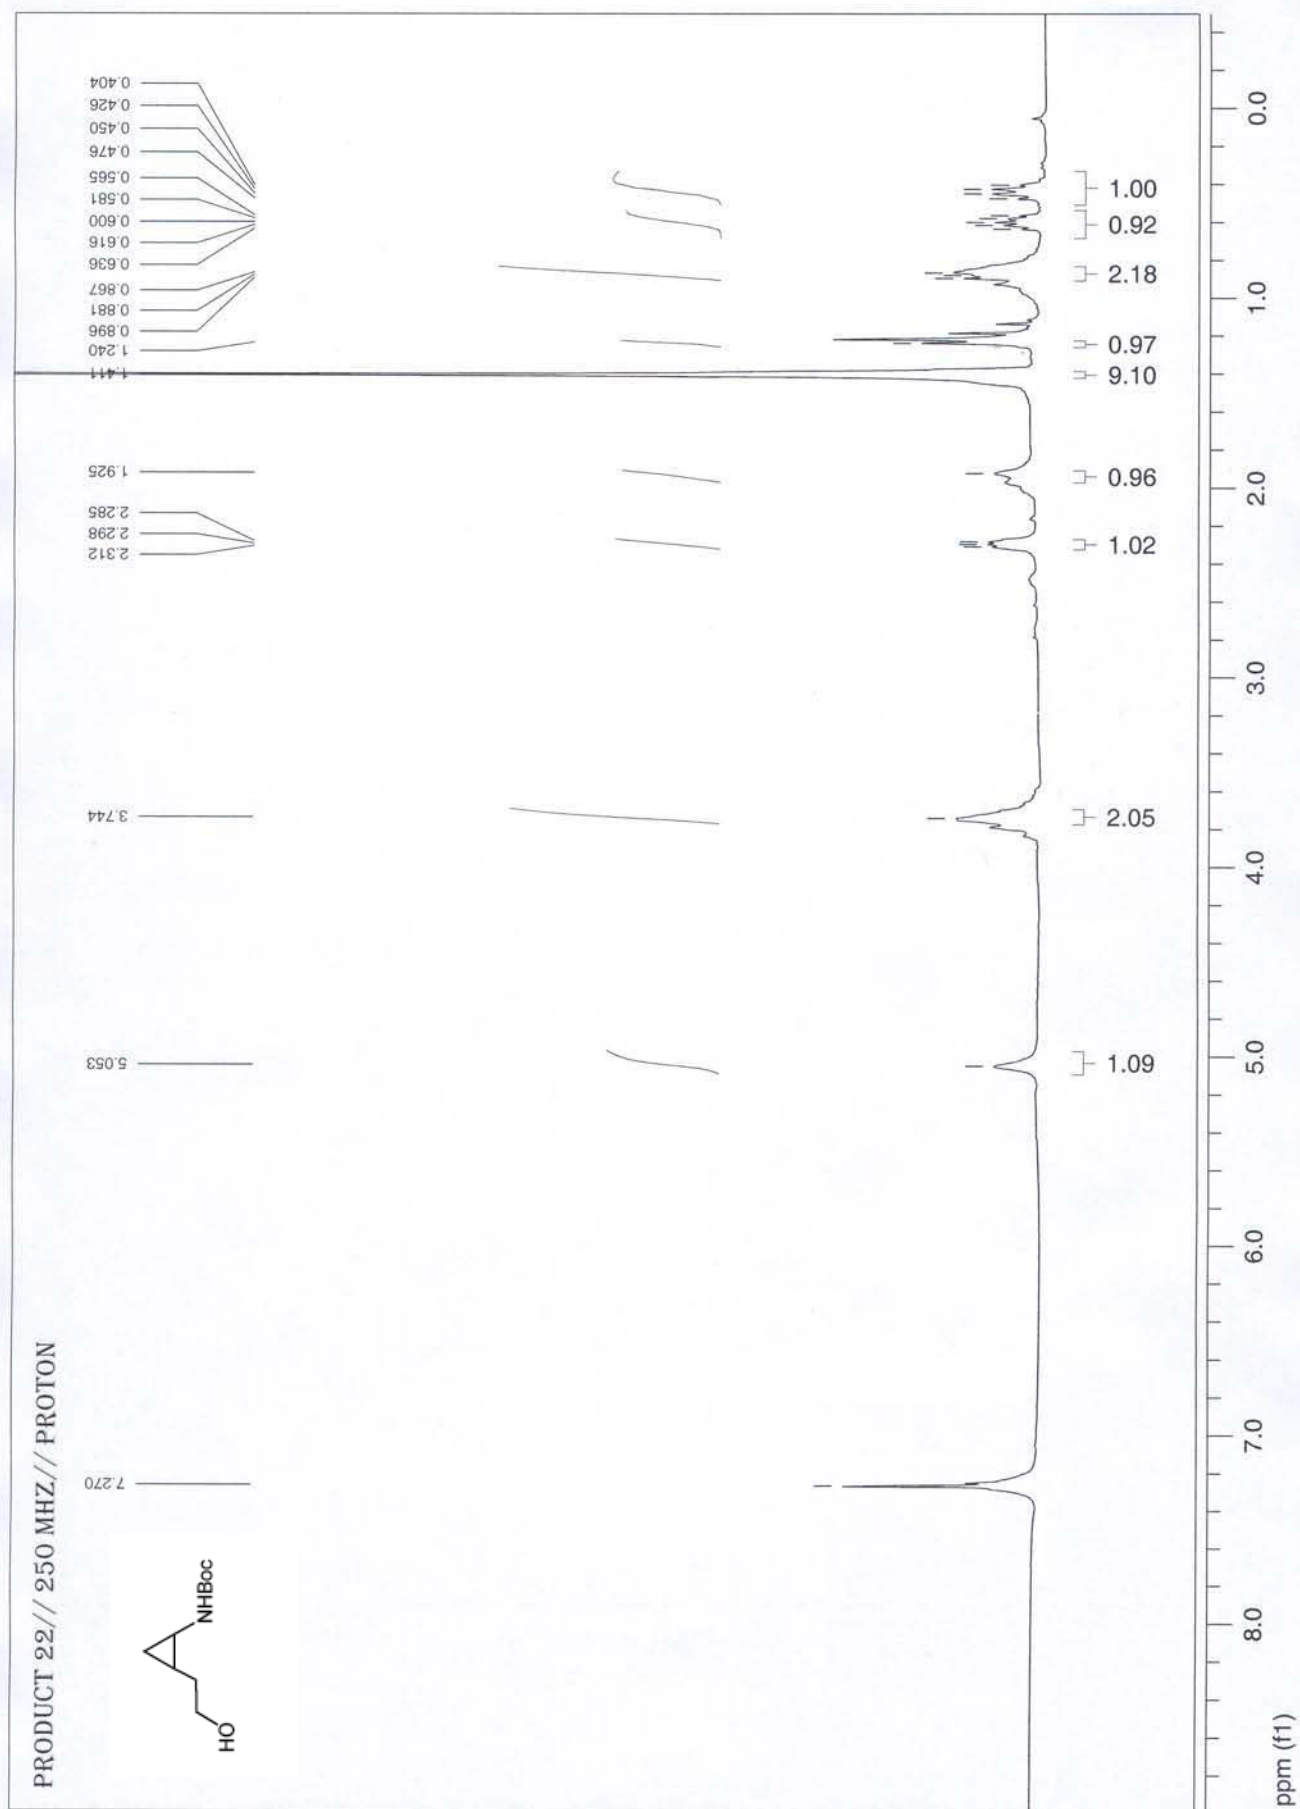

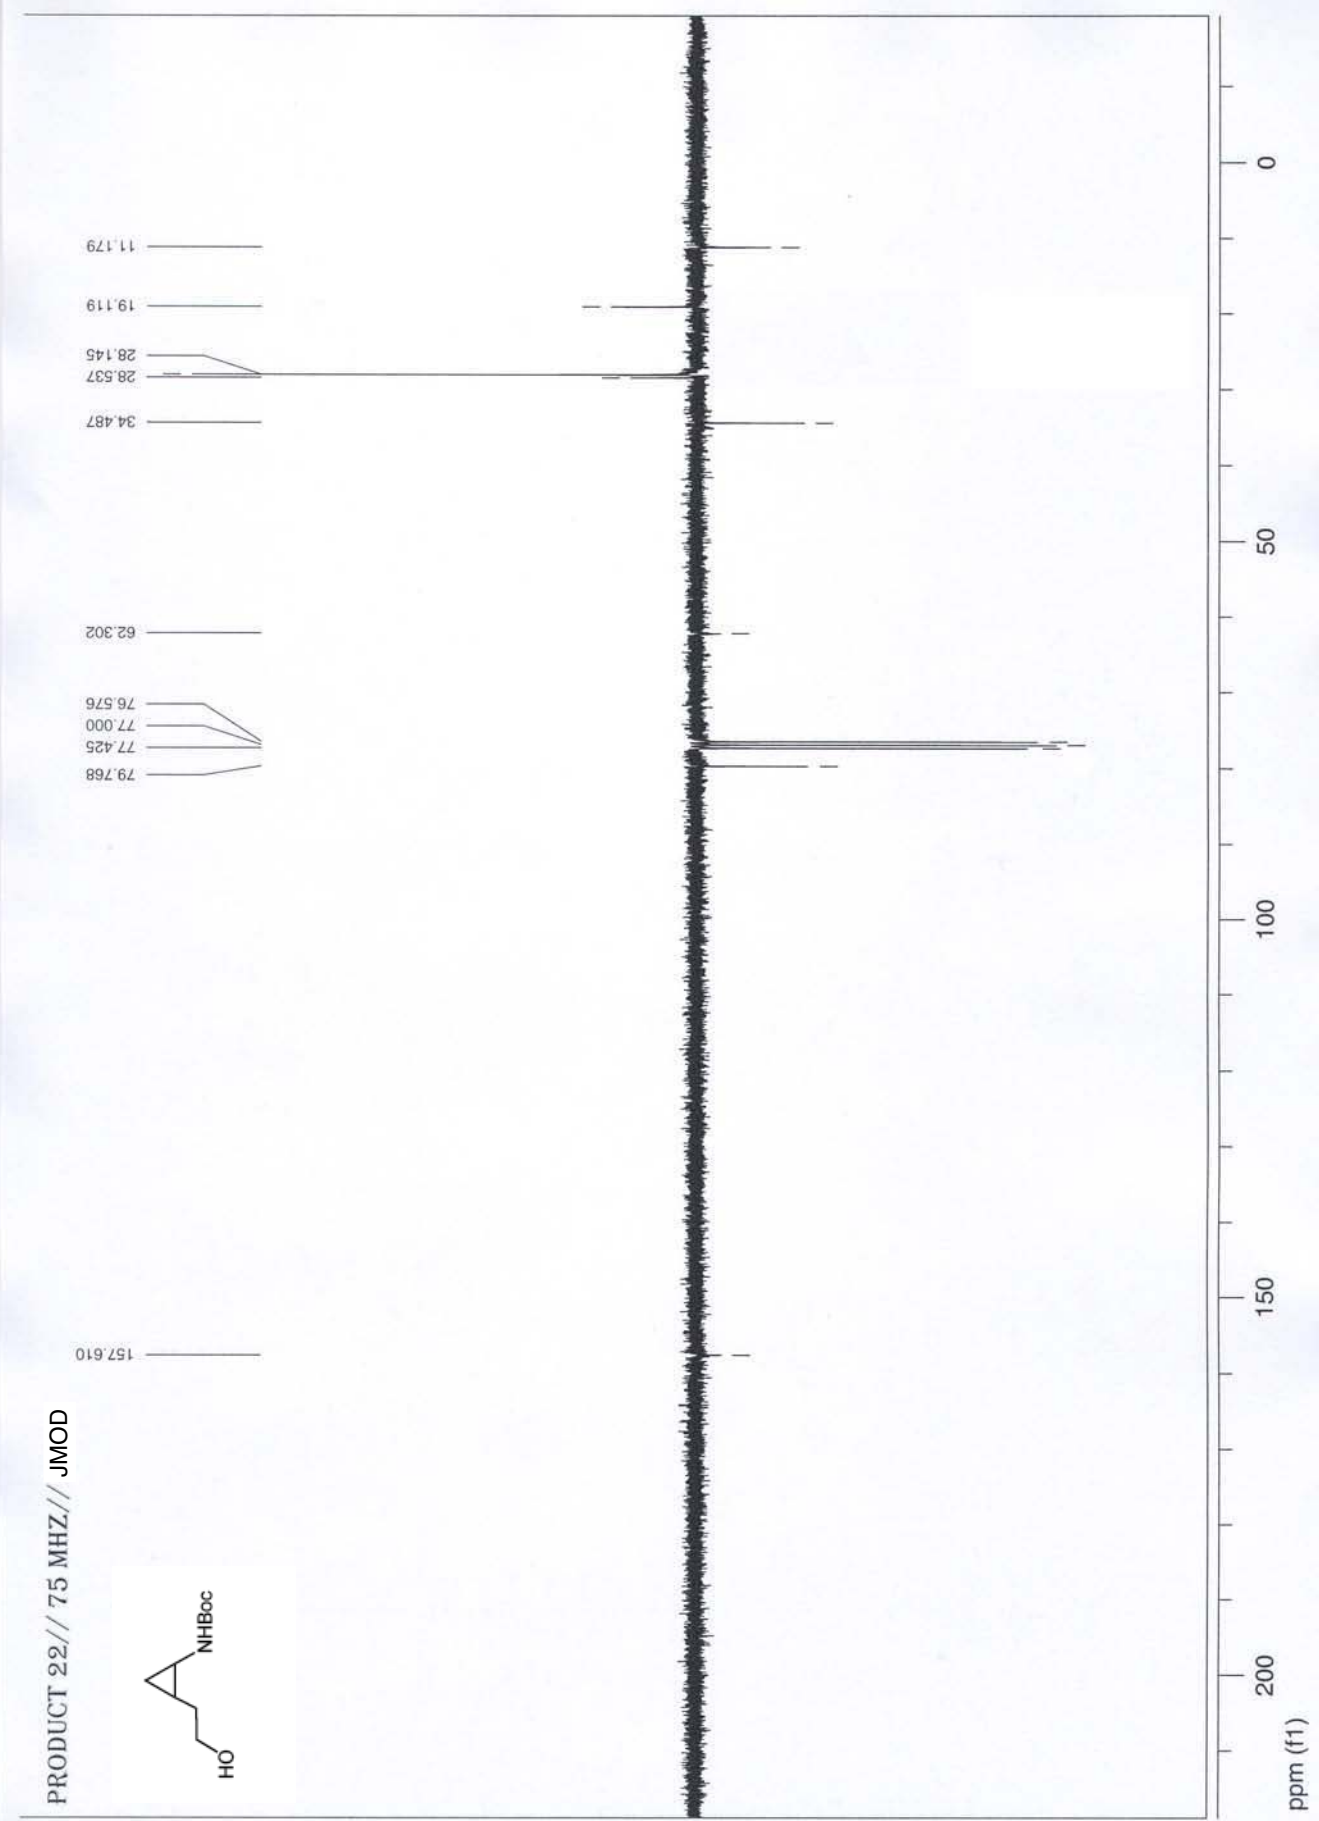

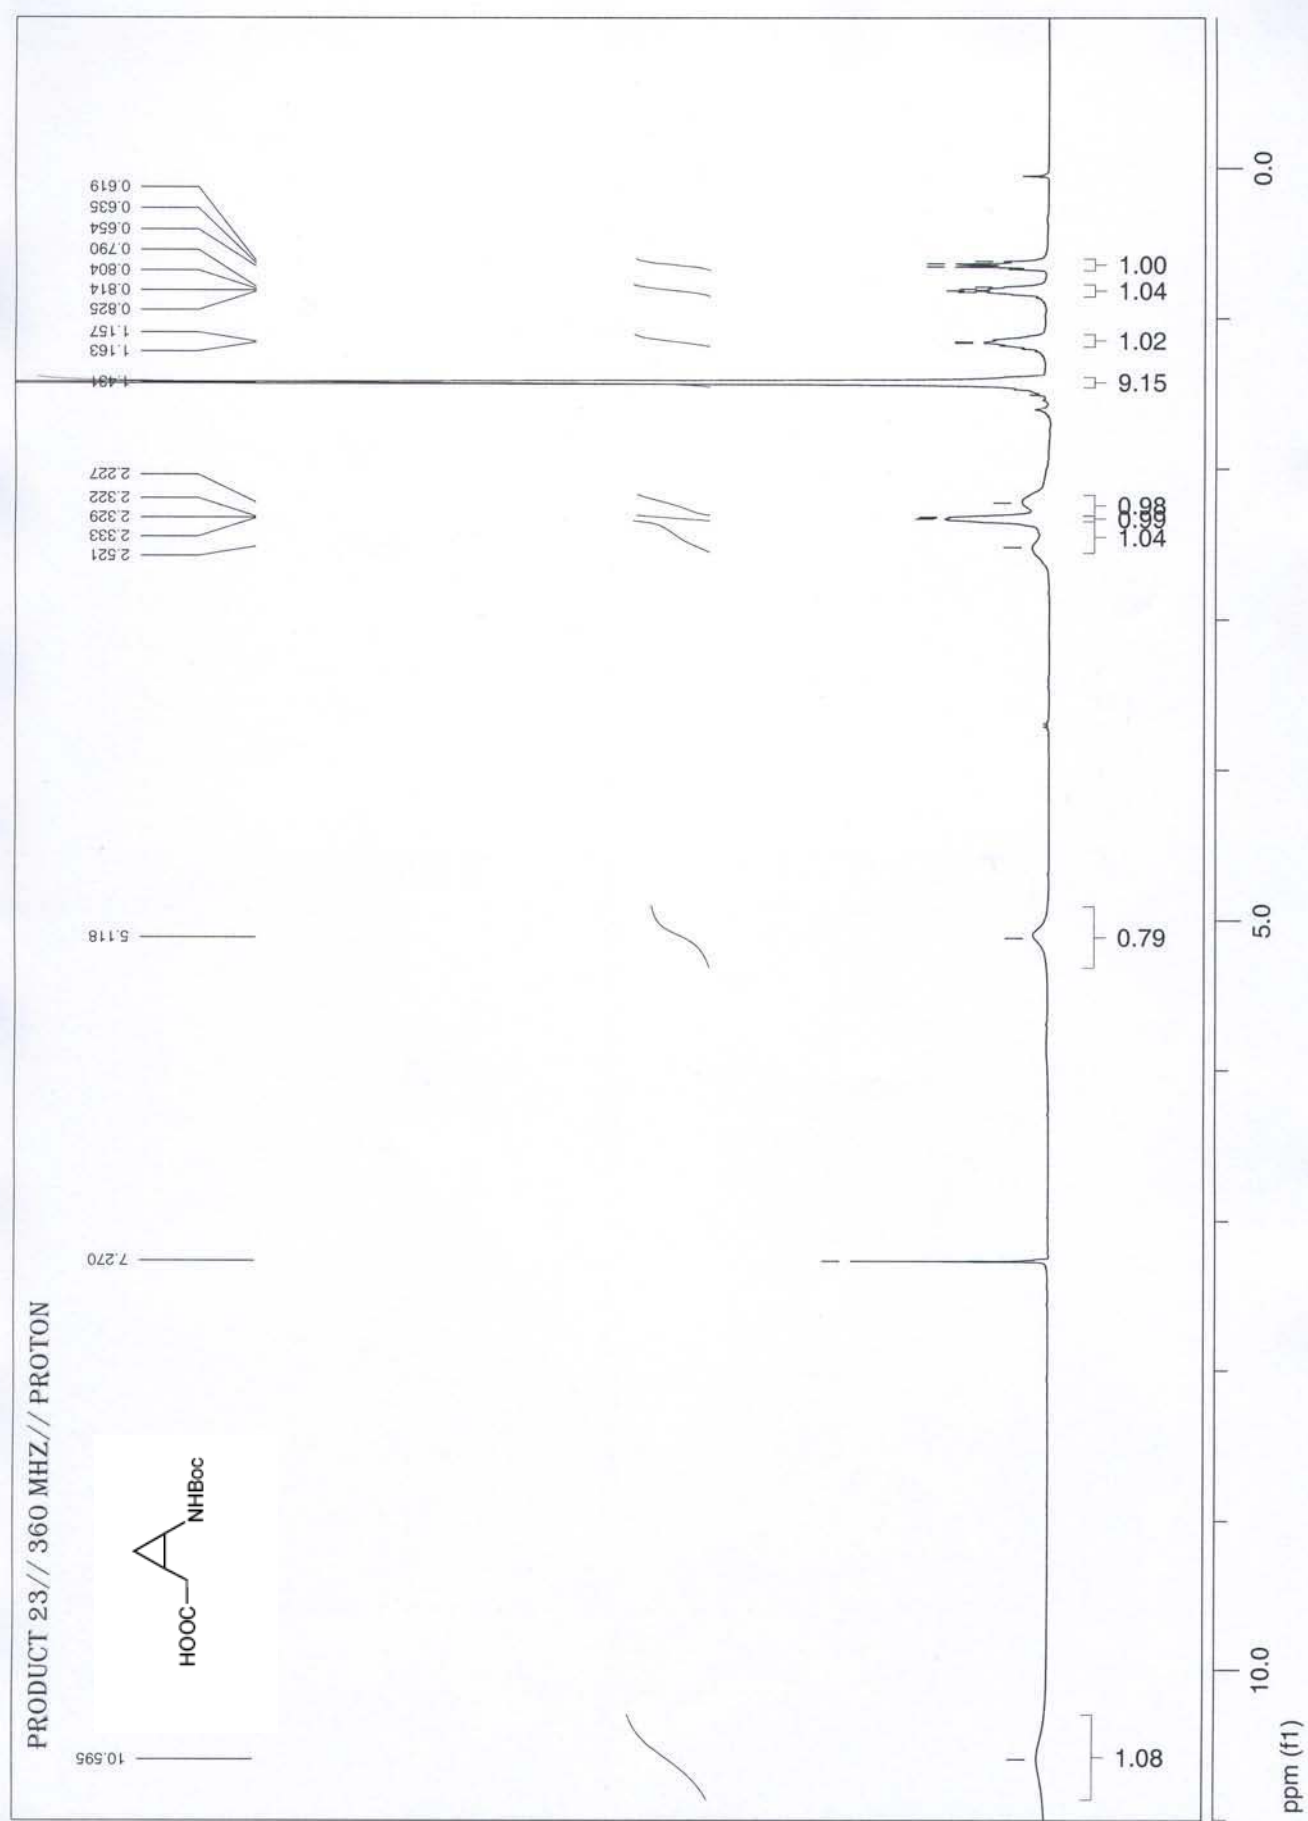

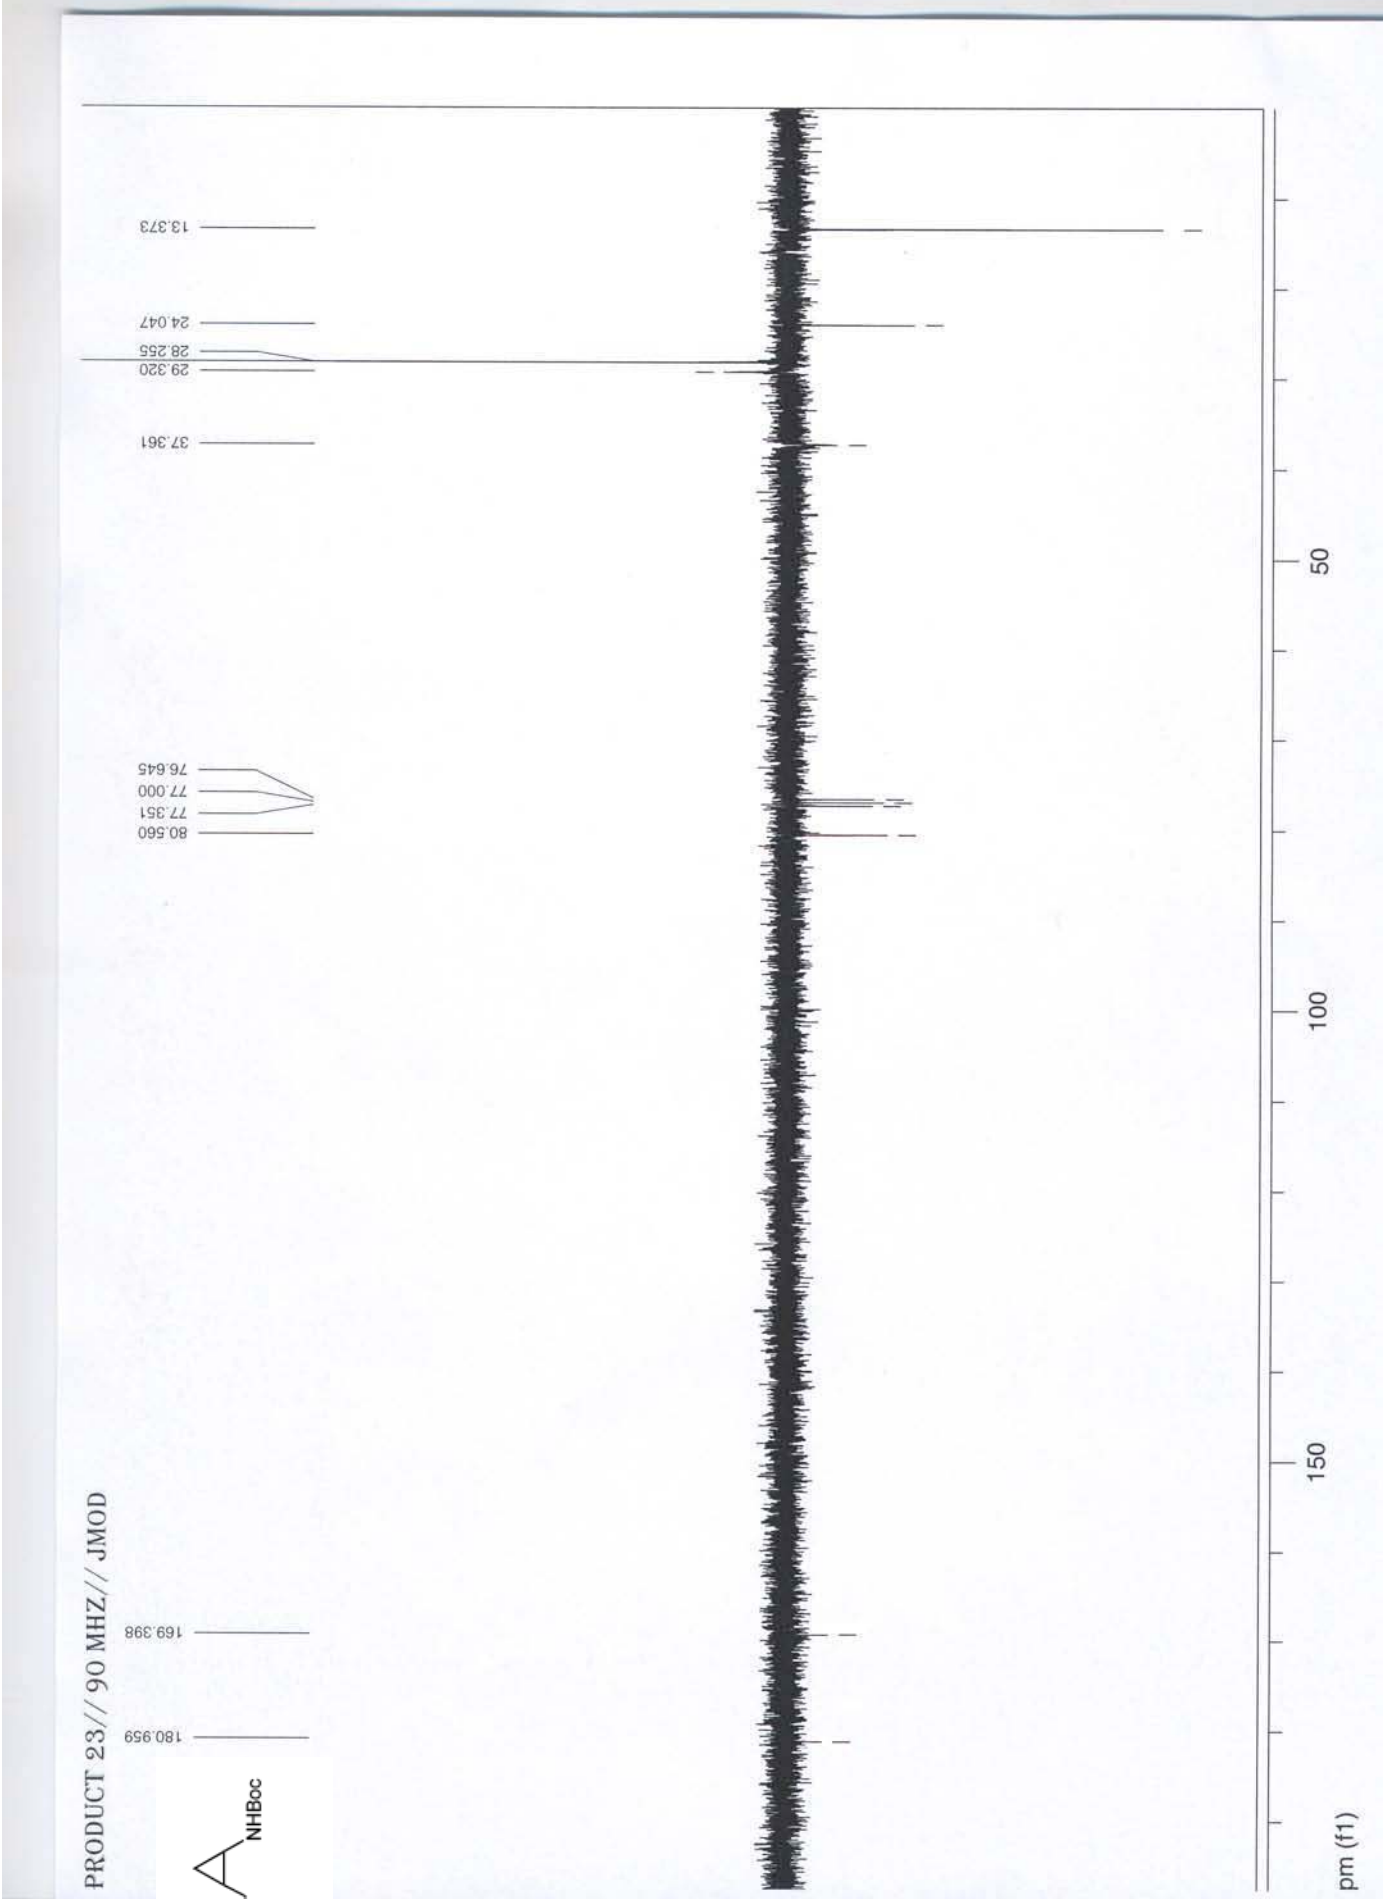

Supplement: c1ob06095c.pdf [file c1ob06095c.pdf]
